# Supplementary material
Source: PubMed Central journal article supplement (PMC6314842)
Supplement: NIHMS1000323-supplement-Supplemental_materials.pdf [file NIHMS1000323-supplement-Supplemental_materials.pdf]

Supporting Information

**Super-resolution Geometric Barcoding for Multiplexed miRNA Profiling**

*Weidong Xu, Peng Yin,\* and Mingjie Dai\**

anie\_201807956\_sm\_miscellaneous\_information.pdf

# Supporting Information

## Table of Content

### 1. Methods

- 1.1 Materials and buffers
- 1.2 Fluorescence microscopy set-up
- 1.3 Preparation of Cy3b-labeled oligonucleotides (DNA-PAINT imager strands)
- 1.4 DNA origami design and self-assembly
- 1.5 Flow chamber sample preparation and DNA-PAINT super-resolution imaging
- 1.6 Super-resolution data processing and image analysis
- 1.7 Preparation of total RNA extraction from HeLa cells

### 2. Supporting figures

### 3. Supporting tables

### 4. References

# 1. Methods

## 1.1 Materials and buffers

All DNA and RNA oligonucleotides were purchased from Integrated DNA Technologies (IDT). 3' amino-modified DNA oligonucleotides ordered from IDT were used for in-house production of fluorophore-labeled imager strands. Cy3b NHS ester (catalog number PA63101) and size-exclusion columns prepacked with Sephadex G-25 (NAP-5, catalog number 45-000-151) were purchased from GE Healthcare Life Sciences. Streptavidin (catalog number S-888) was purchased from Invitrogen. Polyoxyethylenesorbitan monolaurate (Tween 20, catalog number P9416), biotinylated bovine serum albumin (BSA-biotin, catalog number A8549), Protocatechuate 3,4-Dioxygenase (PCD, catalog number P8279), Protocatechuic acid (PCA, catalog number 37580) and 6-Hydroxy-2,5,7,8-tetramethylchromane-2-carboxylic acid (Trolox, catalog number 238813) were purchased from Sigma-Aldrich. Glass slides and coverslips were purchased from VWR. The M13mp18 scaffold was purchased from New England BioLabs. Freeze 'N Squeeze columns were purchased from Bio-Rad. Acetonitrile (ACN, HPLC grade, catalog number A998), triethylamine acetate (TEAA, 2 M, catalog number 400613), TBE buffer (10 ×, catalog number B52), SybrSafe DNA gel stain (catalog number S33102), biotin (Pierce biotin, catalog number 29129), NaCl (5 M, catalog number AM9760G), MgCl<sub>2</sub> (1 M, catalog number AM9530G), Tris-HCl (1 M, pH 8.0, catalog number AM9855G), and ethylenediaminetetraacetic acid (EDTA, 0.5 M, pH 8.0, catalog number AM9260G) were purchased from Thermo Fisher Scientific. Agarose (SeaKem LE agarose) was purchased from Lonza. XTerra MS C18 column (catalog number 186000602) was purchased from Waters. The miRNeasy mini kit (catalog number 217004) was purchased from Qiagen.

The following buffers were used for sample preparation and imaging: HPLC buffer A (0.1 M TEAA, 5% ACN), HPLC buffer B (0.1 M TEAA, 50% ACN), DNA origami folding buffer (12.5 mM MgCl<sub>2</sub>, 1 × TE buffer), DNA-PAINT imaging buffer A (10 mM Tris-HCl, 100 mM NaCl, 0.2% (v/v) Tween 20, pH 8.0), imaging buffer B (10 mM Tris-HCl, 15 mM MgCl<sub>2</sub>, 1 mM EDTA, 0.2% (v/v) Tween 20, pH 8.0) and buffer TP (1 × buffer B, 10 nM PCD, 2.5 mM PCA, 1 mM Trolox).

## **1.2 Fluorescence microscopy set-up**

Fluorescence imaging was carried out on an inverted Nikon Eclipse Ti microscope (Nikon Instruments) with the Perfect Focus System, applying an objective-type TIRF configuration using a Nikon TIRF illuminator with an oil-immersion objective (CFI Apo TIRF 100 $\times$ , numerical aperture (NA) 1.49). Laser excitation with a 561 nm laser (200 mW, Coherent Sapphire) was passed through a clean-up filter (ZET561/10, Chroma Technology) and coupled into the microscope using a beam splitter (ZT488rdc/ZT561rdc/ZT640rdc, Chroma Technology). Fluorescence light was spectrally filtered with emission filter (ET60050m, Chroma Technology). Super-resolution movies were recorded with an electron multiplying charge-coupled device (EMCCD, used without EM gain option) camera (iXon X3 DU-897, Andor Technologies).

## **1.3 Preparation of Cy3b-labeled oligonucleotides (DNA-PAINT imager strands)**

Conjugation reaction solution was prepared by mixing 10  $\mu$ L 3' amino-modified DNA oligonucleotide solution (1 mM) with 1  $\mu$ L NaHCO<sub>3</sub> buffer (1 M NaHCO<sub>3</sub>, pH 8.0) and 2  $\mu$ L Cy3b NHS ester (in DMSO at 10 mg/mL), followed by incubation in dark on shaker for 2h at room temperature. The reaction solution was then run through the size-exclusion column (GE NAP-5); the first peak was collected and lyophilized overnight. The lyophilized sample was resuspended in 0.1 M TEAA and was HPLC purified (Agilent 1200 Semi Prep HPLC) through a C18 2.5  $\mu$ m column (XTerra MS C18) with HPLC pumping rate at 1 mL/min and linear buffer gradient from 100% HPLC buffer A to 50%:50% HPLC buffer A and B over 30 min; the purification product from the sample peak where absorption at 260 nm and 559 nm can both be seen was collected. The sample was lyophilized overnight and resuspended in ultrapure water to 1  $\mu$ M. The prepared imager strands were stored at -20  $^{\circ}$ C until use.

## **1.4 DNA origami design and self-assembly**

DNA origami nanostructures were adapted from 20 nm square grid structures used in our previous work. DNA origami nanostructures were designed with the caDNAno software, and

were based on a twist-corrected variant of the rectangular structure (see Tables S2-5 for the sequence details). Eight staple strands were biotin-modified for surface fixation. Four staple strands were extended with DNA-PAINT docking sequence (P1) with two thymine bases spacers as boundary markers. Eight staple strands were extended with anchor sequences for the immobilization of miRNA targets. See Figure S for details.

The DNA origami nanostructures were self-assembled in a one-pot annealing reaction with 50  $\mu\text{L}$  total volume containing 10 nM scaffold strands (M13mp18), 100 nM unmodified staple strands, 600 nM biotin-modified strands and 1  $\mu\text{M}$  strands with DNA-PAINT or anchor strand extensions in DNA origami folding buffer. The solution was annealed with a thermal ramp cooling from 90  $^{\circ}\text{C}$  to 25  $^{\circ}\text{C}$  over the course of 72 h. The samples were purified by agarose gel electrophoresis (2% agarose, 0.5  $\times$  TBE, 10 mM  $\text{MgCl}_2$ , 0.5  $\times$  SybrSafe pre-stain) at 4.5 V/cm for 1.5 h. For purification, the gel bands were cut, crushed and filled into a Freeze 'N Squeeze column and spun for 10 min at 800g at 4  $^{\circ}\text{C}$ .

## **1.5 Flow chamber sample preparation and DNA-PAINT super-resolution imaging**

Sample preparation was performed in custom-constructed flow chambers between a piece of coverslip and a glass slide. DNA origami nanostructures were fixed on the surface via a biotin-streptavidin-biotin bridge by serially flowing BSA-biotin (1.0 mg/mL in buffer A, 2 min incubation followed by rinse with buffer A), streptavidin (0.5 mg/mL in buffer A, 2 min incubation followed by rinse with buffer A and buffer B), biotin-labeled DNA origami nanostructures (in buffer B, 10 min incubation followed by rinse with buffer B), and biotin (5  $\mu\text{g}/\text{mL}$  in buffer B, 2 min incubation followed by rinse with buffer B). The DNA origami concentration was calibrated for different batches to make sure that similar numbers of DNA origami nanostructures are obtained in the final super-resolution images. For the blinking kinetics characterization, the flow chamber was then filled with 1  $\mu\text{M}$  miRNA target and incubated for 10 min; the flow chamber was finally filled with an imaging buffer (an appropriate concentration of Cy3b-labeled imager strand for the corresponding miRNA target in buffer TP) for imaging. For the multiplexed assays, the flow chamber was filled with 3 nM P1 imager strand for pre-imaging of boundary markers; the flow chamber was then filled with miRNA samples (following exchange-PAINT protocol) and incubated for 90 min; the flow chamber was finally

filled with the imaging buffer containing imager strands for boundary markers and all miRNA targets at appropriate concentrations (see Table S7 for imager strand concentrations) for the final super-resolution imaging of all available docking sites.

DNA-PAINT super-resolution movies were captured with 5 Hz camera frame rate (200 ms per frame) for all images. The laser intensity was 0.3 kW/cm<sup>2</sup>. For the blinking kinetics characterization, 15,000 frames were recorded. For the pre-incubation images of boundary markers, 20,000 frames were recorded. For the post-incubation images in the multiplexed assays, 30,000 frames were recorded.

## **1.6 Super-resolution data processing and image analysis**

DNA-PAINT super-resolution movies were processed with custom-written MATLAB software we previously developed.<sup>1</sup> Briefly, super-resolution images were processed in 3 steps: (i) single-molecule spot detection and localization, (ii) drift correction, (iii) super-resolution rendering and analysis.

Quantification for the super-resolution images to obtain the number of miRNA molecules bound to the DNA nanostructures was performed in the following steps. First, DNA origami nanostructures with intact boundary markers were identified in the pre-incubation image, and the positions of the boundary marker sites were recorded. Next, the recorded boundary marker positions are mapped to the post-incubation super-resolution image, and used to align the nanostructures in the case any translational or rotational movement happened incidentally between the two images. The positions of each miRNA docking sites were then calculated from the positions of boundary markers. Finally, the total number of detected miRNA molecules on all of the docking sites of “qualified” nanostructure grids were recorded and used to calculate the final binding fraction. Here we defined “qualified” origami grids as those that are not distorted (i.e. rectangular in shape, with measured inter-marker distance as expected), and did not show significant movement between the pre- and post-incubation super-resolution images, and only used those nanostructures for the quantification, in order to ensure high detection specificity and reduce any background count caused by potential misalignment of DNA nanostructure grids.

## 1.7 Preparation of total RNA extraction from HeLa cells

We extracted total RNA (>18 nucleotides) from HeLa cells using the Qiagen miRNeasy mini kit, which combines phenol/guanidine-based lysis of samples and silica-membrane-based purification of total RNA. The HeLa cell pellet was prepared by trypsinizing and collecting confluent cells grown in a 100 mm dish, followed by centrifugation at 400 g for 5 min and aspiration of the supernatant. The sample was disrupted and homogenized in 700  $\mu$ L QIAzol Lysis Reagent by incubating at room temperature for 5 min. The sample was mixed with 140  $\mu$ L chloroform, followed by incubation at room temperature for 3 min and centrifugation for 15 min at 12,000g at 4 °C. The upper aqueous phase was collected and mixed with 525  $\mu$ L 100% ethanol. The sample was collected into an RNeasy Mini column by centrifugation at 11,000g for 15 s at room temperature. The column was then washed with 700  $\mu$ L buffer RWT once and 500  $\mu$ L buffer RPE twice by centrifugation at 11,000g for 15 s respectively. The sample was eluted with 50  $\mu$ L RNase-free water by centrifugation at 11,000g for 1 min. The total RNA concentration in the eluted sample was 400 ng/ $\mu$ L with  $A_{260}/A_{280} \approx 2$ . The total RNA was diluted to a final concentration of 40 ng/ $\mu$ L in buffer B for the multiplexed assay.

## 2. Supporting figures

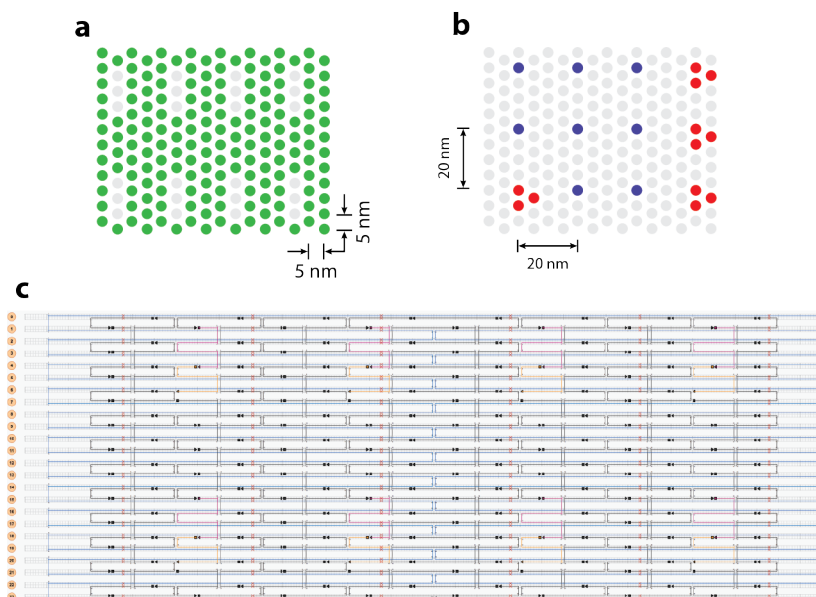

**Figure S1.** DNA origami nanostructures design schematics and strand diagram. (a) Schematic design diagram for the unmodified origami rectangle, where each staple is represented by a dot. Green dots represent staple strands that can be extended with DNA-PAINT docking strands or functionalized as miRNA anchor strands; grey dots represent staple strands that cannot be extended for DNA-PAINT imaging or functionalized as anchor strands. (b) Schematic design diagram for the 20 nm spacing “nano-array” used in this work. Blue dots represent anchor strands; red dots represent boundary markers. (c) Detailed strand diagram for the unmodified origami rectangle, showing twist-corrected DNA origami design. Red crosses show positions of deleted bases; thin blue lines represent circular scaffold strand; black lines represent unmodified staple strands; orange and crimson lines represent strands with biotin extension for surface fixation, and strands with modified wiring pattern to accommodate those orange ones.



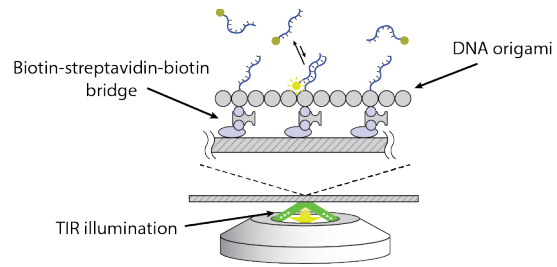

**Figure S2.** DNA-PAINT super-resolution experiment setup with DNA origami samples, illustrated in cross-section view. DNA origami nanostructures are attached to glass slide surface via BSA-biotin, streptavidin, biotin bridge, and illuminated under objective total internal reflection (TIR) setup.

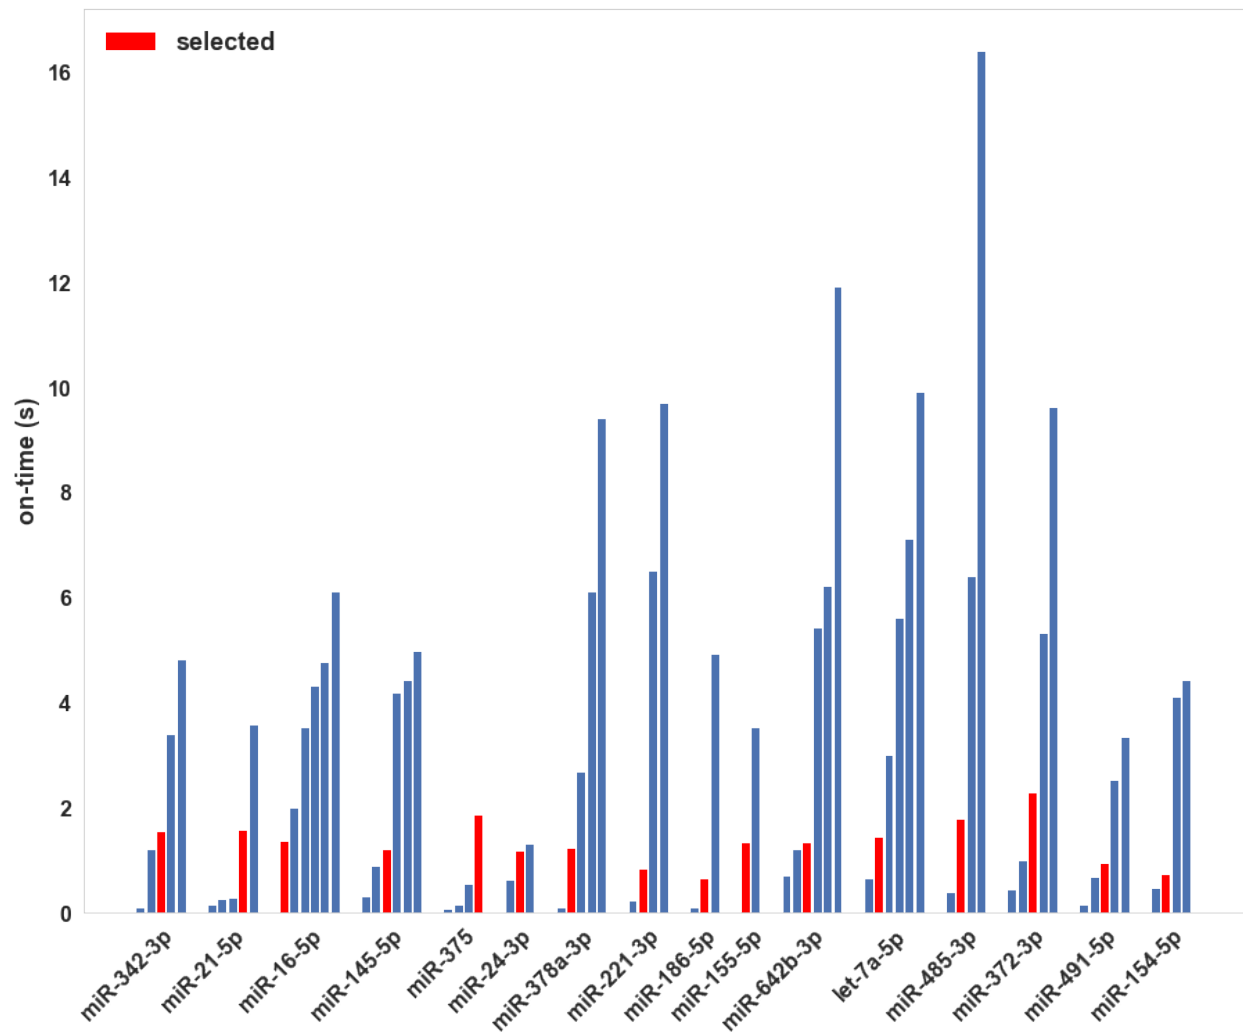

**Figure S3.** Blinking kinetics for 16 miRNA targets with different combinations of anchor strands and imager strands. Each bar from left to right corresponds to a row in Table S4 from top to bottom.

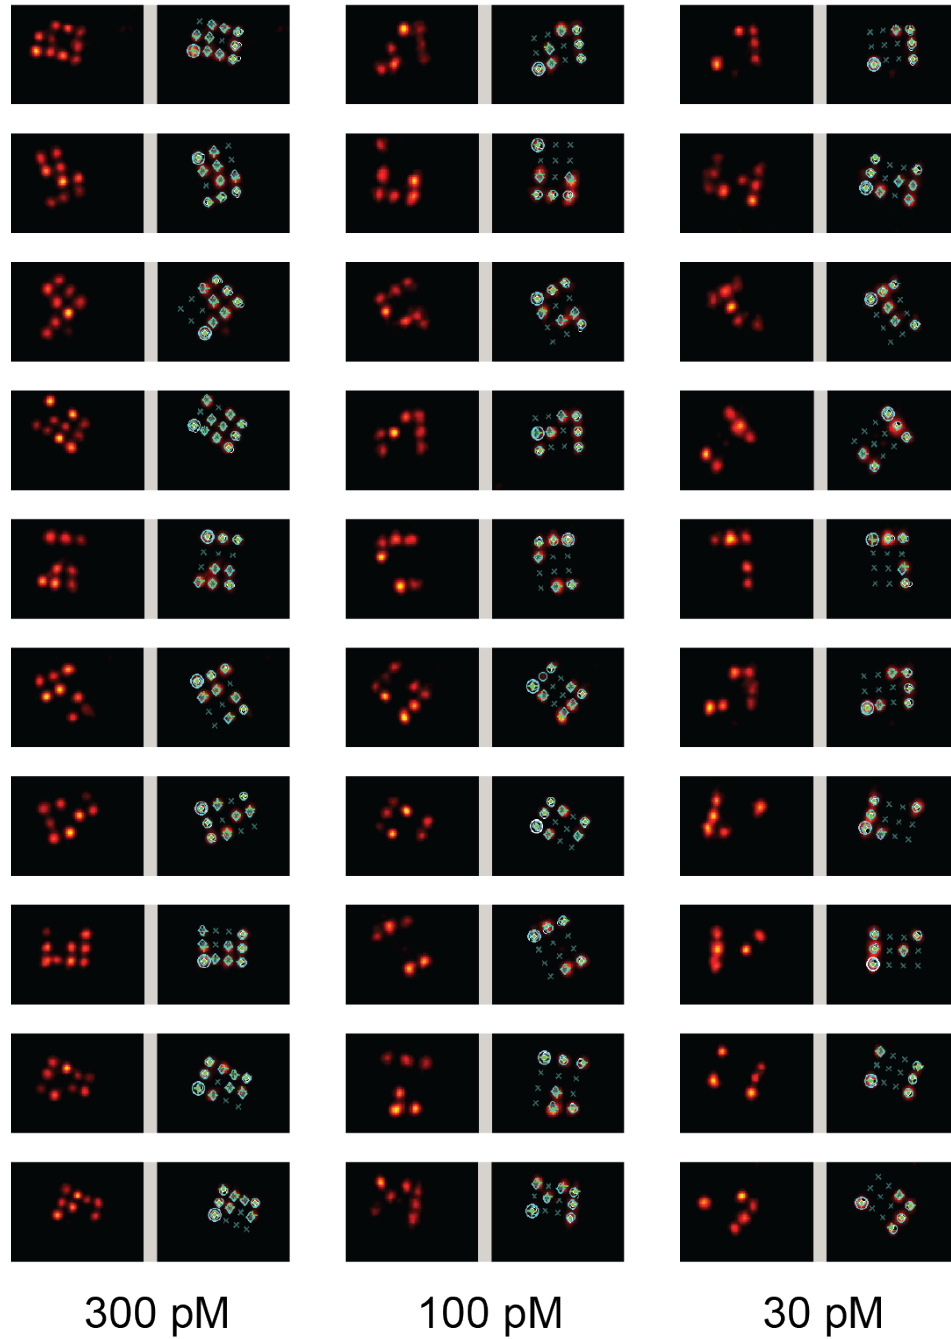

**Figure S4-1.** Part 1 of representative processed super-resolution images and fitting results for various miRNA concentrations in Figure 3b (miRNA incubation time 90 min).

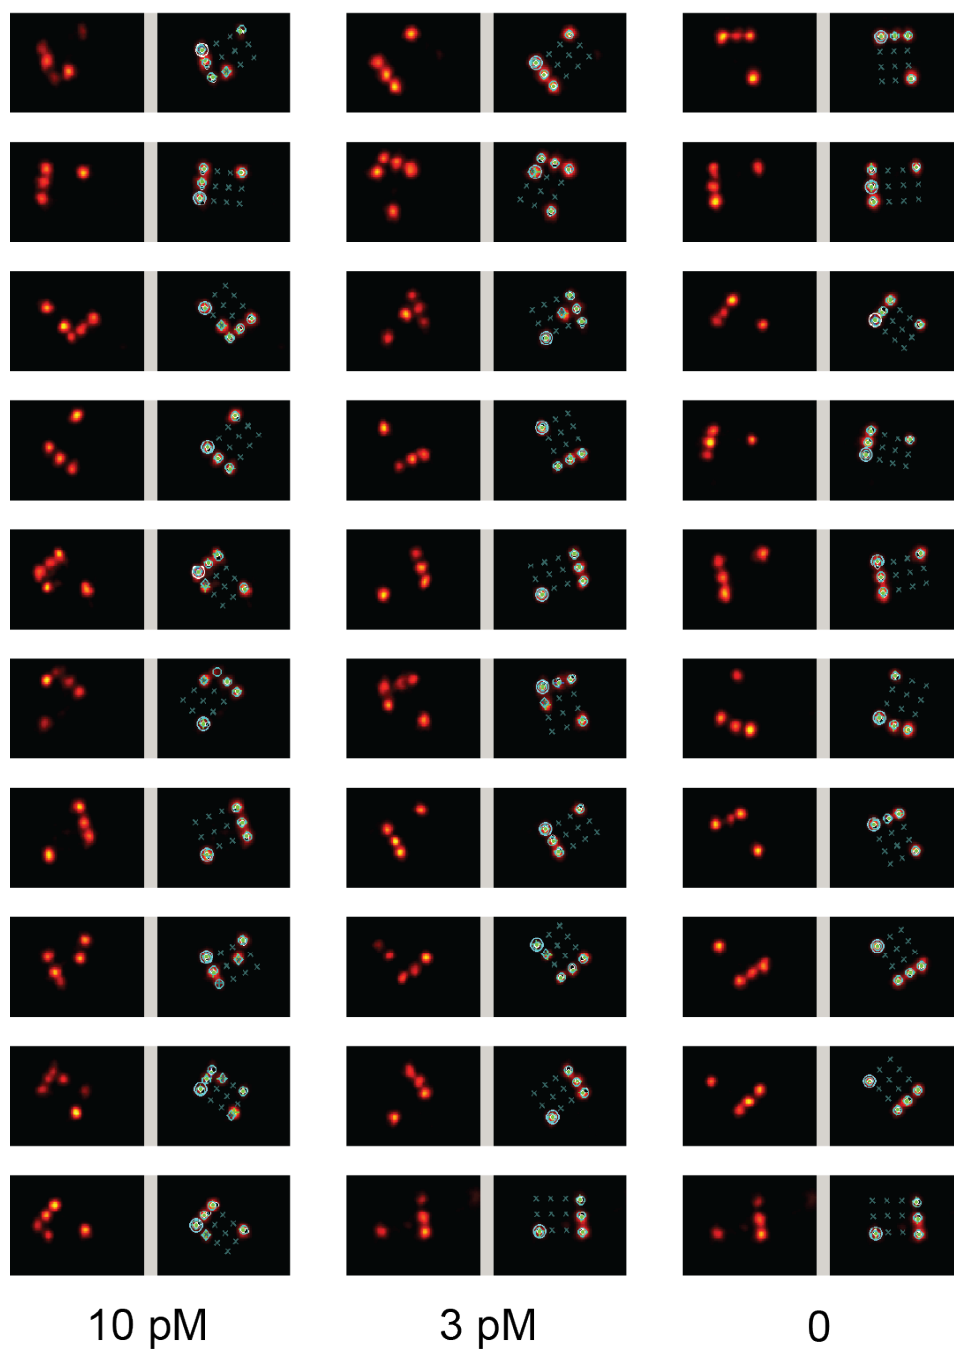

**Figure S4-2.** Part 2 of representative processed super-resolution images and fitting results for various miRNA concentrations in Figure 3b (miRNA incubation time 90 min).

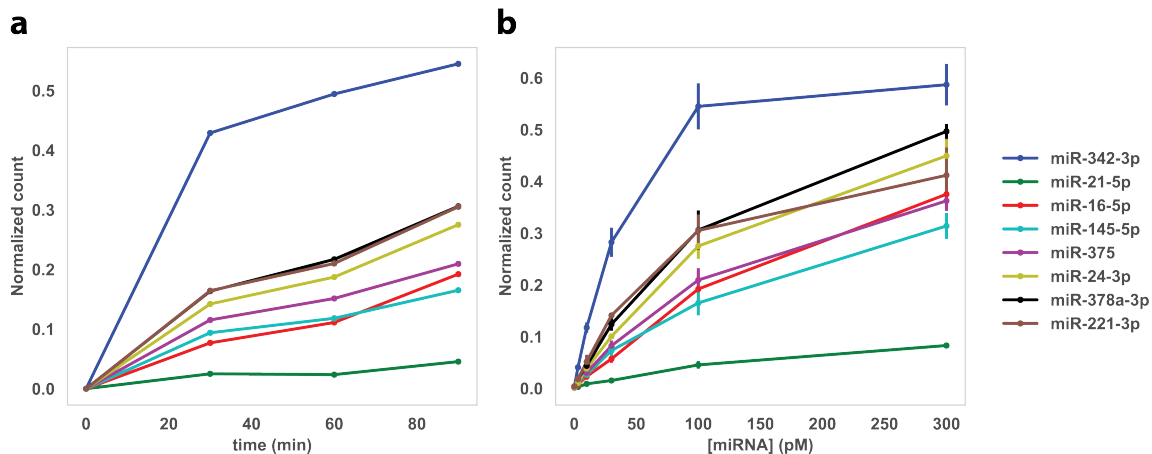

**Figure S5.** Quantification of immobilized miRNAs in the multiplexed assay. Normalized count is calculated by the total count of points at each anchor site in the processed super-resolution image normalized by the total number of valid origamis. (a) Normalized counts for 8 miRNA targets at 100 pM under different lengths of miRNA incubation time. (b) Normalized counts for 8 miRNA targets incubated for 90 min with different concentrations. Error bars represent the standard deviations from 3 independent experiments.

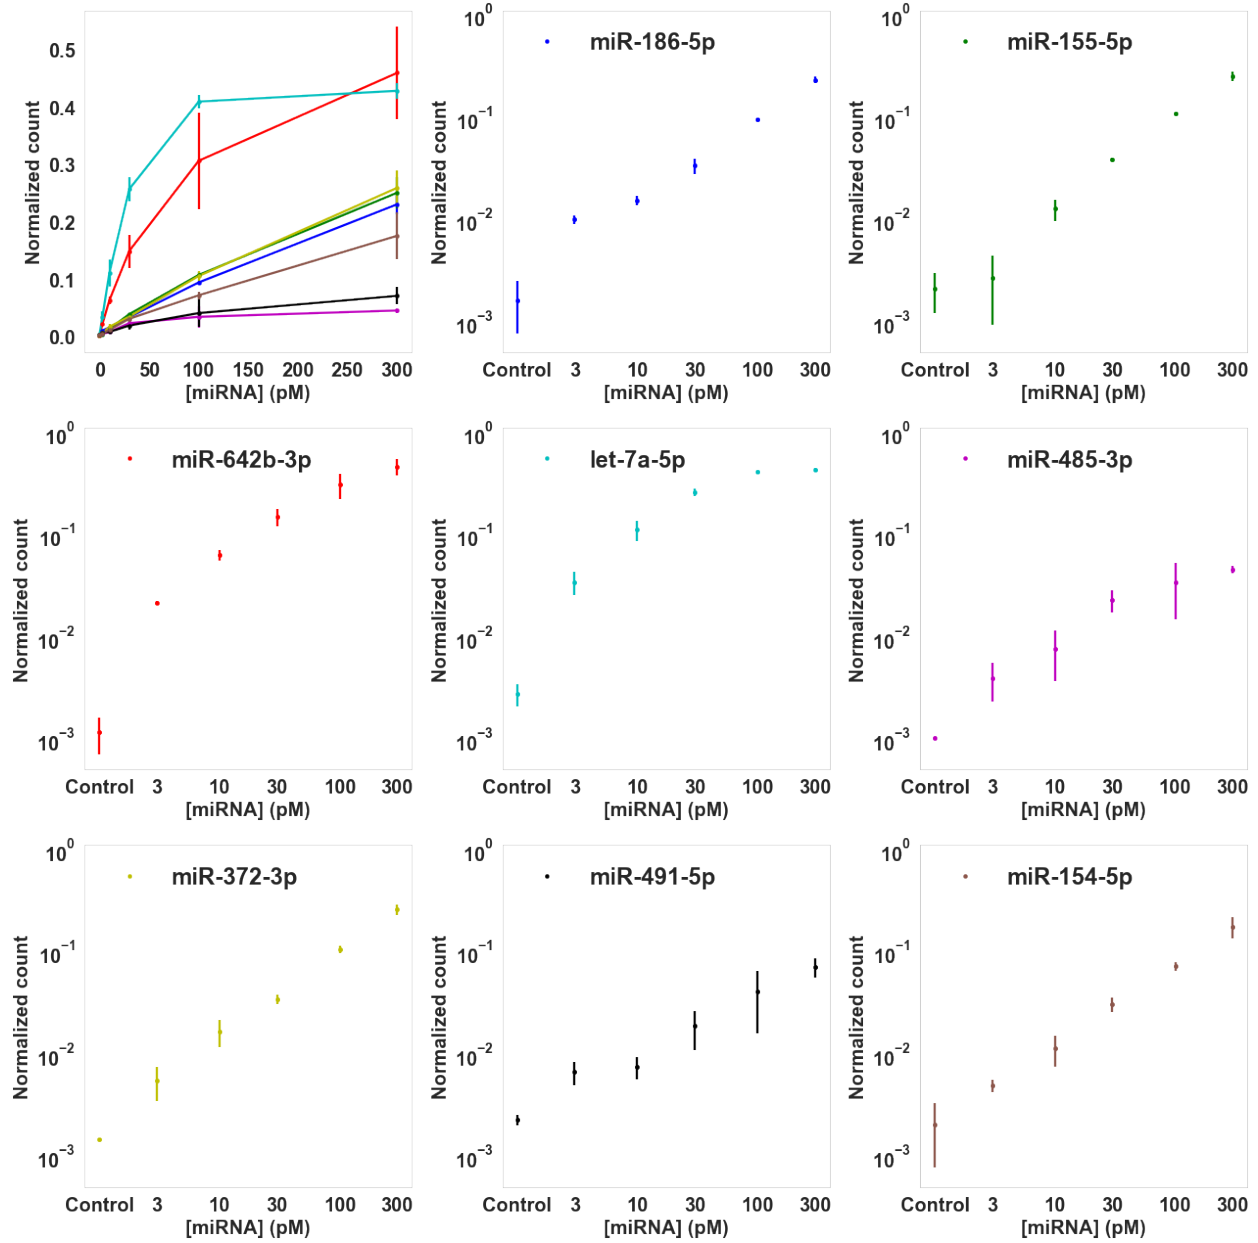

**Figure S6.** Calibration curves with varying target concentrations for the second group of 8-plex assays. Error bars represent the standard deviations from 3 independent experiments. Theoretical limit of detection (LoD) was shown in Table S8.

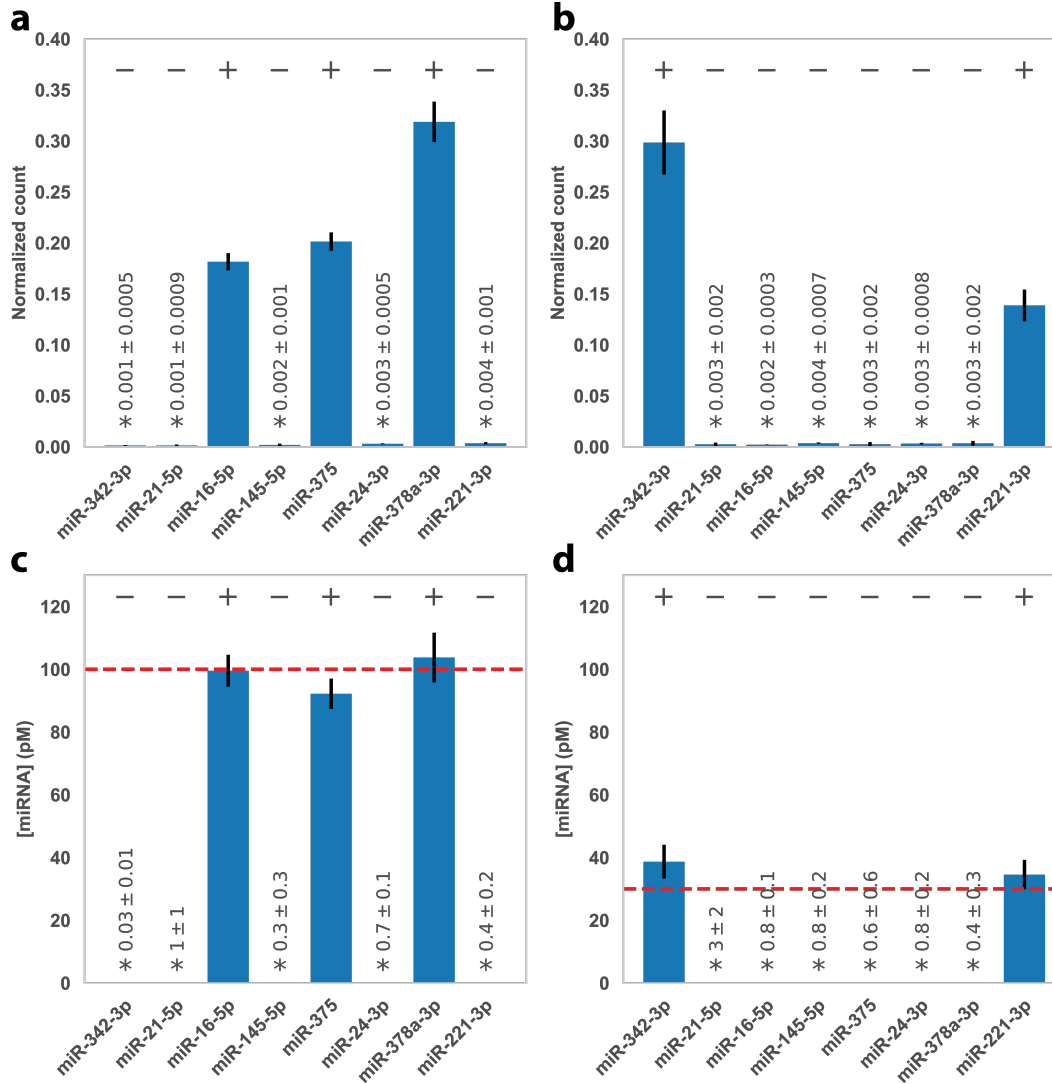

**Figure S7.** Normalized counts for multiplexed detection and quantification of miRNA targets in Figure 4a and 4b. (a, b) Normalized counts for multiplexed detection of different combination of miRNA targets at 100 pM (a) and 30 pM (b). (c, d) The fitted values of miRNA concentrations correspond to a and b. Error bars represent the standard deviation from 3 independent experiments. Plus/minus sign indicates the presence/absence of target miRNAs in samples. Stars indicate normalized counts are lower than limit of detection, where the values of mean and standard deviation of measured normalized counts (a, b) or the values of fitted concentrations (c, d) are shown above.

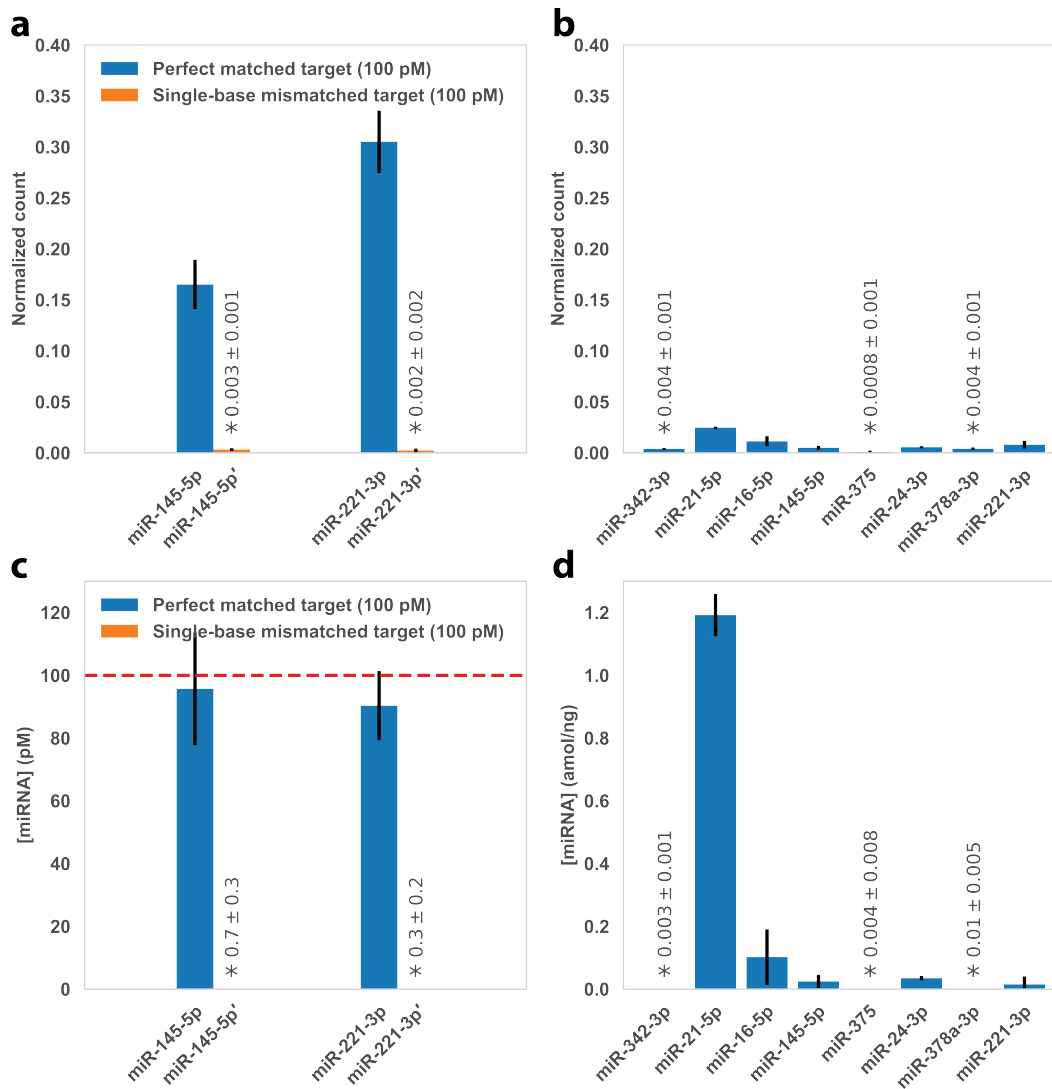

**Figure S8.** Normalized counts for multiplexed detection and quantification of miRNA targets in Figure 4c and 4d. (a) Normalized counts for 2 miRNA targets and their corresponding single-base mismatched targets. (b) Normalized counts for multiplexed detection of miRNA targets in total RNA samples extracted from HeLa cells. Error bars represent the standard deviation from 3 independent experiments. Plus/minus sign indicates the presence/absence of target miRNAs in samples. Stars indicate normalized counts are lower than limit of detection, where the values of mean and standard deviation of measured normalized counts (a, b) or the values of fitted concentrations (c, d) are shown above.



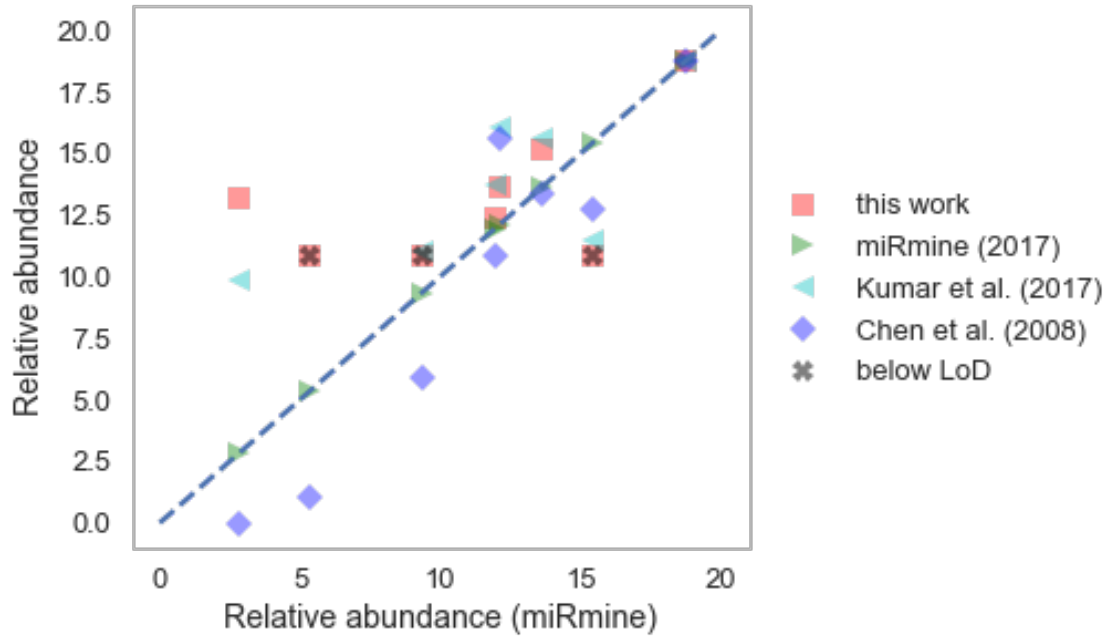

**Figure S9.** Comparison of measurements of first panel of miRNA targets with previous reports using RNA sequencing<sup>2</sup> and microarrays<sup>3-4</sup> based methods. Relative abundance is acquired by adding an offset to the logarithmically scaled results for each set of results so that the measurements for the most abundant miRNA species are aligned.

### 3. Supporting tables

**Table S1.** List of miRNA sequences.

| ID | miRNA name                        | Sequence (5' → 3')            |
|----|-----------------------------------|-------------------------------|
| 1  | miR-342-3p                        | Phos-UCUCACACAGAAAUCGCACCCGU  |
| 2  | miR-21-5p                         | Phos-UAGCUUAUCAGACUGAUGUUGA   |
| 3  | miR-16-5p                         | Phos-UAGCAGCACGUAAAUAUUGGCG   |
| 4  | miR-145-5p                        | Phos-GUCCAGUUUCCAGGAAUCCCU    |
| 5  | miR-375                           | Phos-UUUGUUCGUUCGGCUCGCGUGA   |
| 6  | miR-24-3p                         | Phos-UGGCUCAGUUCAGCAGGAACAG   |
| 7  | miR-378a-3p                       | Phos-ACUGGACUUGGAGUCAGAAGGC   |
| 8  | miR-221-3p                        | Phos-AGCUACAUUGUCUGCUGGGUUUC  |
| 9  | miR-186-5p                        | Phos-CAAAGAAUUCUCCUUUUGGGCU   |
| 10 | miR-155-5p                        | Phos-UUAAUGC UAAUCGUGAUAGGGGU |
| 11 | miR-642b-3p                       | Phos-AGACACAUUUGGAGAGGGACCC   |
| 12 | let-7a-5p                         | Phos-UGAGGUAGUAGGUUGUAUAGUU   |
| 13 | miR-485-3p                        | Phos-GUCAUACACGGCUCUCCUCUCU   |
| 14 | miR-372-3p                        | Phos-AAAGUGCUGCGACAUUUGAGCGU  |
| 15 | miR-491-5p                        | Phos-AGUGGGGAACCCUCCAUGAGG    |
| 16 | miR-154-5p                        | Phos-UAGGUUAUCCGUGUUGCCUUCG   |
|    | Single-base mismatched miR-145-5p | Phos-GUCCACUUUCCAGGAAUCCCU    |
|    | Single-base mismatched miR-221-3p | Phos-AGCUAGA UUGUCUGCUGGGUUUC |

**Table S2.** List of staple sequences for self-assembly of the rectangular DNA origami nanostructure.

| Strand ID    | Sequence (5' → 3')               | Notes            |
|--------------|----------------------------------|------------------|
| 0[111]1[95]  | TAAATGAATTTTCTGTATGGGATTAATTTCTT | Structure staple |
| 0[143]1[127] | TCTAAAGTTTGTGCTGCTTTCCAGCCGACAA  | Structure staple |
| 0[175]0[144] | TCCACAGACAGCCCTCATAGTTAGCGTAACGA | Structure staple |
| 0[207]1[191] | TCACCAGTACAAACTACAACGCCTAGTACCAG | Structure staple |
| 0[239]1[223] | AGGAACCCATGTACCGTAACACTTGATATAA  | Structure staple |
| 0[271]1[255] | CCACCCTCATTTTCAGGGATAGCAACCGTACT | Structure staple |
| 0[47]1[31]   | AGAAAGGAACAACATAAGGAATTCAAAAAA   | Structure staple |
| 0[79]1[63]   | ACAACCTTCAACAGTTTCAGCGGATGTATCGG | Structure staple |
| 1[160]2[144] | TTAGGATTGGCTGAGACTCCTCAATAACCGAT | Structure staple |
| 1[224]3[223] | GTATAGCAAACAGTTAATGCCCAATCCTCA   | Structure staple |
| 1[96]3[95]   | AAACAGCTTTTTGCGGGATCGTCAACACTAAA | Structure staple |
| 2[111]0[112] | AAGCCGCTGATACCGATAGTTGCGACGTTAG  | Structure staple |
| 2[143]1[159] | ATATTGGAACCATCGCCCACGAGAGAAGGA   | Structure staple |
| 2[175]0[176] | TATTAAGAAGCGGGTTTTGCTCGTAGCAT    | Structure staple |
| 2[207]0[208] | TTTCGGAAGTGCCGTCGAGAGGGTGAGTTTCG | Structure staple |
| 2[239]0[240] | GCCCGTATCCGGAATAGGTGTATCAGCCCAAT | Structure staple |
| 2[271]0[272] | GTTTTAACTTAGTACCGCCACCCAGAGCCA   | Structure staple |
| 2[47]0[48]   | ACGGCTACAAAAGGAGCCTTAAATGTGAGAAT | Structure staple |
| 2[79]0[80]   | CAGCGAAACTTGCTTTCGAGGTGTTGCTAA   | Structure staple |
| 3[160]4[144] | TTGACAGGCCACCACCAGAGCCGCGATTTGTA | Structure staple |
| 3[224]5[223] | TTAAAGCCAGAGCCGCCACCCTCGACAGAA   | Structure staple |
| 3[32]5[31]   | AATACGTTTGAAAAGAGGACAGACTGACCTT  | Structure staple |
| 3[96]5[95]   | ACACTCATCCATGTTACTTAGCCGAAAGCTGC | Structure staple |
| 4[143]3[159] | TCATCGCCAACAAAGTACAACGGACGCCAGCA | Structure staple |
| 4[207]2[208] | CCACCCTCTATTCACAAACAAATACCTGCCTA | Structure staple |
| 4[271]2[272] | AAATCACCTTCCAGTAAGCGTCAGTAATAA   | Structure staple |
| 4[79]2[80]   | GCGCAGACAAGAGGCAAAAAGAAATCCCTCAG | Structure staple |
| 5[160]6[144] | GCAAGGCTCACCAGTAGCACCATGGGCTTGA  | Structure staple |
| 5[224]7[223] | TCAAGTTTCATTAAGGTGAATATAAAAAGA   | Structure staple |
| 5[32]7[31]   | CATCAAGTAAAACGAACATAACGAGTTGAGA  | Structure staple |
| 5[96]7[95]   | TCATTAGATGCGATTTTAAAGAACAGGCATAG | Structure staple |
| 6[111]4[112] | ATTACCTTTGAATAAGGCTTGCCCAAATCCGC | Structure staple |
| 6[143]5[159] | GATGGTTTGAACGAGTAGTAAATTTACCATA  | Structure staple |
| 6[175]4[176] | CAGCAAAAGGAAACGTCACCAATGAGCCGC   | Structure staple |
| 6[207]4[208] | TCACCGACGCACCGTAATCAGTAGCAGAACCG | Structure staple |
| 6[239]4[240] | GAAATTATGCCTTTAGCGTCAGACCCGAAAC  | Structure staple |
| 6[271]4[272] | ACCGATTGTCGGCATTTCGGTCATAATCA    | Structure staple |

|                |                                           |                  |
|----------------|-------------------------------------------|------------------|
| 6[79]4[80]     | TTATACCACCAAATCAACGTAACGAACGAG            | Structure staple |
| 7[120]9[127]   | CGTTTACCAGACGACAAAGAAGTTTTGCCATAATTCGA    | Structure staple |
| 7[160]8[144]   | TTATTACGAAGAAGCTGGCATGATTGCGAGAGG         | Structure staple |
| 7[184]9[191]   | CGTAGAAAATACATACCGAGGAAACGCAATAAGAAGCGCA  | Structure staple |
| 7[224]9[223]   | AACGCAAAGATAGCCGAACAAACCTGAAC             | Structure staple |
| 7[248]9[255]   | GTTTATTTTGTGCACAATCTTACCGAAGCCCTTAAATATCA | Structure staple |
| 7[32]9[31]     | TTTAGGACAAATGCTTTAAACAATCAGGTC            | Structure staple |
| 7[56]9[63]     | ATGCAGATACATAACGGGAATCGTCATAAATAAAGCAAAG  | Structure staple |
| 7[96]9[95]     | TAAGAGCAAATGTTTAGACTGGATAGGAAGCC          | Structure staple |
| 8[111]6[112]   | AATAGTAAACACTATCATACCCCTCATTTGTA          | Structure staple |
| 8[143]7[159]   | CTTTTGCAGATAAAAACCAAAATAAAGACTCC          | Structure staple |
| 8[175]6[176]   | ATACCCAACAGTATGTTAGCAAATTAGAGC            | Structure staple |
| 8[207]6[208]   | AAGGAAACATAAAGGTGGCAACATTATCACCG          | Structure staple |
| 8[239]6[240]   | AAGTAAGCAGACACCACGGAATAATATTGACG          | Structure staple |
| 8[271]6[272]   | AATAGCTATCAATAGAAAATCAACATTCA             | Structure staple |
| 8[47]6[48]     | ATCCCCCTATACCACATTCAACTAGAAAAATC          | Structure staple |
| 8[79]6[80]     | AATACTGCCAAAAGGAATTACGTGGCTCA             | Structure staple |
| 9[128]11[127]  | GCTTCAATCAGGATTAGAGAGTTATTTTCA            | Structure staple |
| 9[160]10[144]  | AGAGAGAAAAAATGAAAATAGCAAGCAAACCT          | Structure staple |
| 9[192]11[191]  | TTAGACGGCCAAAATAAGAAACGATAGAAGGCT         | Structure staple |
| 9[224]11[223]  | AAAGTCACAAAATAAACAGCCAGCGTTTTTA           | Structure staple |
| 9[256]11[255]  | GAGAGATAGAGCGTCTTTCCAGAGTTTTTGAA          | Structure staple |
| 9[64]11[63]    | CGGATTGCAGAGCTTAATTGCTGAAACGAGTA          | Structure staple |
| 9[96]11[95]    | CGAAAGACTTTGATAAGAGGTCATATTTTCGCA         | Structure staple |
| 10[111]8[112]  | TTGCTCCTTTCAAATATCGCGTTTGAGGGGGT          | Structure staple |
| 10[143]9[159]  | CCAACAGGAGCGAACCAGACCGGAGCCTTTAC          | Structure staple |
| 10[175]8[176]  | TTAACGTCTAACATAAAAACAGGTAACGGA            | Structure staple |
| 10[207]8[208]  | ATCCCAATGAGAATTAACGTAACAGTTACCAG          | Structure staple |
| 10[239]8[240]  | GCCAGTTAGAGGGTAATTGAGCGCTTTAAGAA          | Structure staple |
| 10[271]8[272]  | ACGCTAACACCCACAAGAATTGAAAATAGC            | Structure staple |
| 10[47]8[48]    | CTGTAGCTTGACTATTATAGTCAGTTTATTGA          | Structure staple |
| 10[79]8[80]    | GATGGCTTATCAAAAAGATTAAGAGCGTCC            | Structure staple |
| 11[128]13[127] | TTTGGGGATAGTAGTAGCATTAAAAGGCCG            | Structure staple |
| 11[160]12[144] | CCAATAGCTCATCGTAGGAATCATGGCATCAA          | Structure staple |
| 11[192]13[191] | TATCCGGTCTCATCGAGAACAAGCGACAAAAG          | Structure staple |
| 11[224]13[223] | GCGAACCTCCAAGAACGGGTATGACAATAA            | Structure staple |
| 11[256]13[255] | GCCTTAAACCAATCAATAATCGGCACGCGCCT          | Structure staple |
| 11[32]13[31]   | AACAGTTTTGTACCAAAAACATTTTATTTTC           | Structure staple |
| 11[64]13[63]   | GATTTAGTCAATAAAGCCTCAGAGAACCCTCA          | Structure staple |
| 11[96]13[95]   | AATGGTCAACAGGCAAGGCAAAGAGTAATGTG          | Structure staple |
| 12[143]11[159] | TTCTACTACGCGAGCTGAAAAGGTTACCGCGC          | Structure staple |

|                |                                   |                  |
|----------------|-----------------------------------|------------------|
| 12[207]10[208] | GTACCGCAATTCTAAGAACGCGAGTATTATTT  | Structure staple |
| 12[271]10[272] | TGTAGAAATCAAGATTAGTTGCTCTTACCA    | Structure staple |
| 12[79]10[80]   | AAATTAAGTTGACCATTAGATACTTTTGCG    | Structure staple |
| 13[128]15[127] | GAGACAGCTAGCTGATAAATTAATTTTTGT    | Structure staple |
| 13[160]14[144] | GTAATAAGTTAGGCAGAGGCATTTATGATATT  | Structure staple |
| 13[192]15[191] | GTAAAGTAATCGCCATATTTAACAAAACTTT   | Structure staple |
| 13[224]15[223] | ACAACATGCCAACGCTCAACAGTCTTCTGA    | Structure staple |
| 13[256]15[255] | GTTTATCAATATGCGTTATACAAAACCGCGT   | Structure staple |
| 13[32]15[31]   | AACGCAAAATCGATGAACGGTACCGGTTGA    | Structure staple |
| 13[64]15[63]   | TATATTTTGTCAATGCGCTGAGAGTGAAGATT  | Structure staple |
| 13[96]15[95]   | TAGGTAAACTATTTTTGAGAGATCAAACGTTA  | Structure staple |
| 14[111]12[112] | GAGGGTAGGATTCAAAAGGGTGAGACATCCAA  | Structure staple |
| 14[143]13[159] | CAACCGTTTCAAATCACCATCAATTTCGAGCCA | Structure staple |
| 14[175]12[176] | CATGTAATAGAATATAAAGTACCAAGCCGT    | Structure staple |
| 14[207]12[208] | AATTGAGAATTCTGTCCAGACGACTAAACCAA  | Structure staple |
| 14[239]12[240] | AGTATAAAGTTCAGCTAATGCAGATGTC TTTC | Structure staple |
| 14[271]12[272] | TTAGTATCACAAATAGATAAGTCCACGAGCA   | Structure staple |
| 14[79]12[80]   | GCTATCAGAAATGCAATGCC TGAATTAGCA   | Structure staple |
| 15[160]16[144] | ATCGCAAGTATGTAAATGCTGATGATAGGAAC  | Structure staple |
| 15[224]17[223] | CCTAAATCAAAATCATAGGTCTAAACAGTA    | Structure staple |
| 15[32]17[31]   | TAATCAGCGGATTGACCGTAATCGTAACCG    | Structure staple |
| 15[96]17[95]   | ATATTTTGGCTTTCATCAACATTATCCAGCCA  | Structure staple |
| 16[111]14[112] | TGTAGCCATTAAAATTCGCATTAAATGCCGGA  | Structure staple |
| 16[143]15[159] | GCCATCAAGCTCATTTTTTAACCACAAATCCA  | Structure staple |
| 16[175]14[176] | TATAACTAACAAAGAACGCGAGAACGCCAA    | Structure staple |
| 16[207]14[208] | ACCTTTTTATTTTAGTTAATTTTCATAGGGCTT | Structure staple |
| 16[239]14[240] | GAATTTATTTAATGGTTTGAATATTC TTACC  | Structure staple |
| 16[271]14[272] | CTTAGATTTAAGGCGTTAAATAAAGCCTGT    | Structure staple |
| 16[47]14[48]   | ACAAACGGAAGCCCAAAAACACTGGAGCA     | Structure staple |
| 16[79]14[80]   | GCGAGTAAAAATTTAAATTTGTTACAAAG     | Structure staple |
| 17[160]18[144] | AGAAAACAAAGAAGATGATGAAACAGGCTGCG  | Structure staple |
| 17[96]19[95]   | GCTTTCGGATTACGCCAGCTGGCGGCTGTTTC  | Structure staple |
| 18[111]16[112] | TCTTCGCTGCACCGCTTCTGGTGCGGCC TTCC | Structure staple |
| 18[143]17[159] | CAACTGTTGCGCCATTTCGCCATTCAAACATCA | Structure staple |
| 18[175]16[176] | CTGAGCAAAAATTAATTACATTTTGGGTTA    | Structure staple |
| 18[207]16[208] | CGCGCAGATTACCTTTTTTAATGGGAGAGACT  | Structure staple |
| 18[239]16[240] | CCTGATTGCAATATATGTGAGTGATCAATAGT  | Structure staple |
| 18[271]16[272] | CTTTTACAAAATCGTCGCTATTAGCGATAG    | Structure staple |
| 18[47]16[48]   | CCAGGGTTGCCAGTTTGAGGGGACCCGTGGGA  | Structure staple |
| 18[79]16[80]   | GATGTGCTTCAGGAAGATCGCACAATGTGA    | Structure staple |
| 19[160]20[144] | GCAATTCACATATTCCTGATATCAAAGTGTA   | Structure staple |

|                |                                                     |                       |
|----------------|-----------------------------------------------------|-----------------------|
| 19[224]21[223] | CTACCATAGTTTGAGTAACATTTAAAATAT                      | Structure staple      |
| 19[32]21[31]   | GTCGACTTCGGCCAACGCGGGGTTTTTC                        | Structure staple      |
| 19[96]21[95]   | CTGTGTGATTCGCTTGCGCTCACTAGAGTTGC                    | Structure staple      |
| 20[143]19[159] | AAGCCTGGTACGAGCCGGAAGCATAGATGATG                    | Structure staple      |
| 20[207]18[208] | GCGGAACATCTGAATAATGGAAGGTACAAAAT                    | Structure staple      |
| 20[271]18[272] | CTCGTATTAGAAATTCGCTAGATACAGTAC                      | Structure staple      |
| 20[79]18[80]   | TTCCAGTCGTAATCATGGTCATAAAAGGGG                      | Structure staple      |
| 21[120]23[127] | CCCAGCAGGCGAAAAATCCCTTATAAATCAAGCCGGCG              | Structure staple      |
| 21[160]22[144] | TCAATATCGAACCTCAAATATCAATTCCGAAA                    | Structure staple      |
| 21[184]23[191] | TCAACAGTTGAAAGGAGCAAATGAAAAATCTAGAGATAGA            | Structure staple      |
| 21[224]23[223] | CTTTAGGGCCTGCAACAGTGCCAATACGTG                      | Structure staple      |
| 21[248]23[255] | AGATTAGAGCCGTCAAAAAACAGAGGTGAGCCATTAGT              | Structure staple      |
| 21[32]23[31]   | TTTTCACTCAAAGGGCGAAAAACCATCACC                      | Structure staple      |
| 21[56]23[63]   | AGCTGATTGCCCTTCAGAGTCCACTATTAAGGGTGCCGT             | Structure staple      |
| 21[96]23[95]   | AGCAAGCGTAGGGTTGAGTGTGTAGGGAGCC                     | Structure staple      |
| 22[111]20[112] | GCCCAGAGTCCACGCTGGTTTGCAGCTAACT                     | Structure staple      |
| 22[143]21[159] | TCGGCAAATCCTGTTTGATGGTGGACCCCAA                     | Structure staple      |
| 22[175]20[176] | ACCTTGCTTGGTCAGTTGGCAAAGAGCGGA                      | Structure staple      |
| 22[207]20[208] | AGCCAGCAATGAGGAAGTTATCATCATTTT                      | Structure staple      |
| 22[271]20[272] | CAGAAGATTAGATAATACATTTGTGACAAA                      | Structure staple      |
| 22[79]20[80]   | TGGAACAACCGCCTGGCCCTGAGGCCCGCT                      | Structure staple      |
| 23[128]23[159] | AACGTGGCGAGAAAGGAAGGAAACCAGTAA                      | Structure staple      |
| 23[160]22[176] | TAAAAGGGACATTCTGGCCAACAAAGCATC                      | Structure staple      |
| 23[192]22[208] | ACCCTTCTGACCTGAAAGCGTAAGACGCTGAG                    | Structure staple      |
| 23[224]22[240] | GCACAGACAATATTTTTGAATGGGGTCAGTA                     | Structure staple      |
| 23[256]22[272] | CTTTAATGCGGAACTGATAGCCCCACCAG                       | Structure staple      |
| 23[32]22[48]   | CAAATCAAGTTTTTTGGGGTCGAAACGTGGA                     | Structure staple      |
| 23[64]22[80]   | AAAGCACTAAATCGGAACCCTAATCCAGTT                      | Structure staple      |
| 23[96]22[112]  | CCCGATTTAGAGCTTGACGGGAAAAAGAATA                     | Structure staple      |
| 1[128]4[128]   | TGACAACCTCGCTGAGGCTTGCAATTATACCAAGCGGATGATAAA       | Biotin helper strand  |
| 1[192]4[192]   | GCGGATAACCTATTATTCTGAAACAGACGATTGGCCTTGAAGAGCCAC    | Biotin helper strand  |
| 1[256]4[256]   | CAGGAGGTGGGGTCAGTGCCCTTGAGTCTCTGAATTTACCGGGAACCAG   | Biotin helper strand  |
| 1[64]4[64]     | TTTATCAGGACAGCATCGGAACGACACCAACCTAAAACGAGGTCAATC    | Biotin helper strand  |
| 15[128]18[128] | TAAATCAAAATAATTCGCGTCTCGGAAACCAGGCAAAGGGAAGG        | Biotin helper strand  |
| 15[192]18[192] | TCAAATATAACCTCCGGCTTAGGTAACAATTTCAATTTGAAGGCGAATT   | Biotin helper strand  |
| 15[256]18[256] | GTGATAAAAAGACGCTGAGAAGAGATAACCTTGCTTCTGTTCGGGAGA    | Biotin helper strand  |
| 15[64]18[64]   | GTATAAGCCAACCCGTCGGATTCTGACGACAGTATCGGCCCAAGGCG     | Biotin helper strand  |
| 4[127]6[120]   | Biotin-TTTTTGTGTGCTGACGAGAAACACCAAATTTCAACTTTAAT    | Biotin labeled strand |
| 4[191]6[184]   | Biotin-TTTTACCCTCAGAAACATCGATAGCATTGAGCCATTTGGGAA   | Biotin labeled strand |
| 4[255]6[248]   | Biotin-TTTTAGCCACCACGTAGCGCGTTTTCAAGGGAGGGAAGGTAAA  | Biotin labeled strand |
| 4[63]6[56]     | Biotin-TTTTATAAGGGAACCGGATATTCATTACGTCAGGACGTTGGGAA | Biotin labeled strand |

|                |                                                       |                       |
|----------------|-------------------------------------------------------|-----------------------|
| 18[127]20[120] | Biotin-TTTTGGGATCGGCAATTCCACACAACAGGTGCCTAATGAGTG     | Biotin labeled strand |
| 18[191]20[184] | Biotin-TTTTATTCATTTTGTGGATTATACTAAGAAACCACCAGAAG      | Biotin labeled strand |
| 18[255]20[248] | Biotin-TTTTAAACAATAACGTAAAACAGAAATAAAAAATCCTTTGCCCGAA | Biotin labeled strand |
| 18[63]20[56]   | Biotin-TTTTATTAAGTTTACCGAGCTCGAATTCGGGAAACCTGTCGTGC   | Biotin labeled strand |
| 1[32]3[31]     | AGGCTCCAGAGGCTTTGAGGACACGGGTAATTATACATCTA             | Boundary marker       |
| 4[47]2[48]     | GACCAACTAATGCCACTACGAAGGGGGTAGCATTATACATCTA           | Boundary marker       |
| 6[47]4[48]     | TACGTAAAGTAATCTTGACAAGAACCGAAGTTTATACATCTA            | Boundary marker       |
| 9[32]11[31]    | TTTACCCCAACATGTTTTAAATTTCCATATTTATACATCTA             | Boundary marker       |
| 12[47]10[48]   | TAAATCGGGATTCCCAATCTGCGATATAATGTTATACATCTA            | Boundary marker       |
| 14[47]12[48]   | AACAAGAGGGATAAAAATTTTAGCATAAAGCTTATACATCTA            | Boundary marker       |
| 17[224]19[223] | CATAAATCTTTGAATACCAAGTGTAGAACTTATACATCTA              | Boundary marker       |
| 17[32]19[31]   | TGCATCTTTCCAGTCACGACGGCCTGCAGTTATACATCTA              | Boundary marker       |
| 20[239]18[240] | ATTTTAAAAATCAAAATTATTTGCACGGATTTCGTTATACATCTA         | Boundary marker       |
| 20[47]18[48]   | TTAATGAACTAGAGGATCCCGGGGGTAACGTTATACATCTA             | Boundary marker       |
| 22[239]20[240] | TTAACACCAGCACTAACAACATAATCGTTATTATTATACATCTA          | Boundary marker       |
| 22[47]20[48]   | CTCCAACGCAGTGAGACGGGCAACCAGCTGCATTATACATCTA           | Boundary marker       |
| 4[111]2[112]   | GACCTGCTCTTTGACCCCGAGGGAGTTA                          | Anchor site 1         |
| 4[175]2[176]   | CACCAGAAAGGTTGAGGCAGGTCATGAAAG                        | Anchor site 2         |
| 4[239]2[240]   | GCCTCCCTCAGAATGGAAAGCGCAGTAACAGT                      | Anchor site 3         |
| 12[111]10[112] | TAAATCATATAACCTGTTTAGCTAACCTTTAA                      | Anchor site 4         |
| 12[175]10[176] | TTTTATTTAAGCAAATCAGATATTTTTTGT                        | Anchor site 5         |
| 12[239]10[240] | CTTATCATTCGACTTGCGGGAGCCTAATTT                        | Anchor site 6         |
| 20[111]18[112] | CACATTAAAATGTTATCCGCTCATGCGGGCC                       | Anchor site 7         |
| 20[175]18[176] | ATTATCATTC AATATAATCCTGACAATTAC                       | Anchor site 8         |

**Table S3.** Sequence for M13mp18 phage single-stranded DNA scaffold.

TTCCCTTCCTTTCTCGCCACGTTTCGCCGGCTTTCCCGTCAAGCTCTAAATCGGGGGCTCCCTTTAGGGTCCGATTTAGTGCTTT  
ACGGCACCTCGACCCCAAAAACTTGATTTGGGTGATGGTTCACGTAGTGGGCCATCGCCCTGATAGACGGTTTTTCGCCCTTTGA  
CGTTGGAGTCCACGTTCTTTAATAGTGGACTCTTTGTCCAACTGGAACAACACTCAACCCTATCTCGGGCTATTTCTTTGATTTA  
TAAGGATTTTGCCGATTTTCGGAACCACCATCAAACAGGATTTTCGCCTGCTGGGGCAAACCAGCGTGGACCGCTTGTGCAACTC  
TCTCAGGGCCAGGCGGTGAAGGGCAATCAGCTGTTGCCCGTCTCACTGGTGAAGAAAGAAAAACCACCTGGCGCCCAATACGCAAAC  
CGCTCTCCCGCGCGTTGGCCGATTCATTAATGACAGTGGCAGCAGGTTTTCCGACTGGAAGCGGGCAGTGAGCGCAACGCA  
ATTAATGTGAGTTAGCTCACTCATTAGGCACCCAGGCTTACACTTTATGCTTCCGGCTCGTATGTGTGTGGAATTTGTGAGCGG  
ATAACAATTTACACAGGAAACAGCTATGACCATGATTACGAATTCGAGCTCGGTACCCGGGGATCCTCTAGAGTCGACCTGCAGG  
CATGCAAGCTTGGCACTGGCCGTCGTTTTACAACGTCGTGACTGGGAAAACCCGGCGTTACCCAACCTAATCGCTTGCAGCACA  
TCCCCCTTTTCGCCAGCTGGCGTAATAGCGAAGAGGCCCGCACCGATCGCCCTTCCCAACAGTTGCGCAGCCTGAATGGCGAATGGC  
GCTTTGCCTGGTTTTCCGGCACCAGAAGCGGTGCCGAAAGCTGGCTGGAGTGGCATCTTCTGAGGCCGATACCTGTCGTGCTGCC  
TCAAACCTGGCAGATGCAGGTTACGATGCGCCCATCTACACCAACGTCGACCTATCCCATACGGTCAATCCCGCTTTGTTCCAC  
GGAGAAATCCGACGGTTGTTACTCGCTCACATTTAATGTTGATGAAAGCTGGCTACAGGAAGGCCAGCAGCAATTTATTTTGATG  
GCGTTCCTATTGGTTAAAAAATGAGCTGATTTAACAATAATTTAATGCGAATTTTAAACAAAATATTAACGTTTACAATTTAAATAT  
TTGCTTATACAATCTTCTGTTTTTGGGGCTTTTCTGATTATCAACGGGGTACATATGATTGACATGCTAGTTTTACGATTACCG  
TTCATCGATTCTCTGTTTGTCCAGACTCTCAGGCAATGACCTGATAGCCTTTGTAGATCTCTCAAAAATAGCTACCCCTCTCCGG  
CATTAATTTATCAGCTAGAACGGTTGAATATCATATGATGGTGTATTTGACTGTCTCCGGCCTTTCTCACCCCTTTGAAATCTTTAC  
CTACACATTACTCAGCATTGCATTTAAAATATATGAGGGTCTAAAAATTTTTATCCTTGCCTTGAATAAAGGCTTCTCCCGCA  
AAAGTATTACAGGGTATAAAGTTTGGTACAACCTCAGGTTAGCTTATGCTCTGAGGCTTTATTGCTTAATTTTCTTAATTTCTTT  
GCCTTGCCTGTATGATTTATTGGATGTTAATGCTACTACTATTAGTAGAATTGATGCCACCTTTTCAGCTCGCGCCCAATGAAA  
ATATAGCTAAACAGGTATTGACCATTTGCGAAATGATCTAATGGTCAAACATAAATCTACTCGTTCGCAGAATTGGGAATCAACT  
GTTATATGGAATGAACTTCCAGACACCGTACTTTAGTTGCATATTTAAAACATGTTGAGCTACAGCATTATATTCAGCAATTAAG  
CTCTAAGCCATCCGCAAAAATGACCTCTTATCAAAGGAGCAATTAAGGTACTCTCTAATCTTGACCTGTTGGAGTTTGTCTCCG  
GTCTGGTTGCTTTGAAGCTCGAATTAACCGCGATATTTGAAGTCTTTACGCTTCCCTTAAATCTTTTGTATGCAATCCGCTTT  
GCTTCTGACTATAATAGTCAGGGTAAAGACCTGATTTTGGATTTATGGTCAATCTCGTTTTTCTGAACTGTTTAAAGCATTGAGGG  
GGATTCAATGAATATTTATGACGATTCGCGAGTATTGGACGCTATCCAGTCTAAACATTTTACTATTACCCCTCTGGCAAACTT  
CTTTTGCAAAAGCCTCTCGCTATTTTGGTTTTTATCGTCTGTTAAACGAGGGTTATGATAGTGTGCTCTTACTATGCCTCGT  
AATTCCTTTTGGCGTTATGATCTGCATTAGTTGAATGTGGTATTCCTAAATCTCAACTGATGAATCTTTCTACCTGTAATAATGT  
TGTTCCGTTAGTTCGTTTTATTAACGTAGATTTTTCTTCCCAACGTCCTGACTGGTATAATGAGCCAGTTCCTAAAAATCGCATAAG  
GTAATTCACAATGATTAAGTTGAAATTAACCTCAAGGCCAATTAACACTACTCTGTTCTGGTGTCTCTCGTTCAGGGCAAGCCTT  
ATTCACTGAATGAGCAGCTTTGTTACGTTGATTTGGGTAATGAATATCCGGTCTTGTCAAGATTACTCTTGATGAAGGTACGCCA  
GCCTATGCGCCTGGTCTGTACACCGTTCATCTGTCTCTTTCAAAGTTGGTCAGTTCGGTTCCTTATGATTGACCGTCTGCGCCT  
CGTTCGGCTAAGTAACATGGAGCAGGTGCGGGATTTGACACAAATTTATCAGGCATGATACAAATCTCCGTTGACTTTGTTTC  
GCGCTTGGTATAATCGCTGGGGTCAAAGATGAGTGTTTTAGTGTATTTCTTTTGCCTCTTTGCTTTTGGTTTGGTGCCTTCGTAGT  
GGCATTACGATTTTACCCTTTAATGAAACTTCCCTATGAAAAAGTCTTTAGTCTCAAGCCTCTGTAGCCGTTGTACCCCTC  
GTTCCGATGCTGTCTTTCGCTGTGAGGGTGACGATCCCGCAAAAGCGCCCTTAACTCCGTCAGCCAGCCAGCAATATAT  
CGGTTATGCGTGGGCGATGGTTGTGTCATTGTCGGCGCAACTATCGGTATCAAGCTGTTAAGAAATTCACCTCGAAAGCAAGCT  
GATAAACCGATACAATTAAGGCTCCTTTTGGAGCTTTTTTTTTGGAGATTTTCAACGTGAAAAAATTTATTTTCGCAATTCCTTT  
AGTTGTCTCTTTCTATCTCACCTCGCTGAAACTGTGAAAGTTGTTAGCAAAAATCCCATACAGAAAATTCATTTACTAACGTCT  
GGAAAGACGACAAAATTTAGATCGTTACGCTAACTATGAGGGCTGTCTGTGGAATGCTACAGGCCTGTAGTTTGTACTGGTGC  
GAACTCAGTGTACGGTACATGGGTTCTATTTGGCTTGTCTATCCCTGAAAATGAGGGTGGTGGCTCTGAGGGTGGCGCTCTGA  
GGTGGCGGTTCTGAGGGTGGCGGTACTAAACCTCCTGAGTACGGTATACACCTATTTCCGGGTACTACTATATCAACCCCTCG  
ACGGCACTTATCCGCTGGTACTGAGCAAAACCCGCTAATCCTAATCCTTCTCTTGAGGAGTCTCAGCCTCTTAATACTTTTCATG  
TTTCAGAATAATAGGTTCCGAAATAGGCAGGGGGCAATTAAGTGTATATACGGGCATGTTACTCAAGGCCTGACCCGTTAAAC  
TTATTAACAGTACACTCCTGTATCATCAAAGCCATGTATGACGCTTACTGGAACGGTAAATTCAGAGACTGCGCTTTCCATTCTG  
GCTTTAATGAGGATTTATTTGTTTGTGAATATCAAGGCCAATCGTCTGACCTGCCCAACCTCCTGTCAATGCTGGCGGGCGCT  
GGTGGTGGTCTGGTGGCGGCTCTGAGGGTGGTGGCTCTGAGGGTGGCGGTTCTGAGGGTGGCGGCTCTGAGGGAGGCGGTTCCGG  
TGGTGGCTCTGGTTCCGGTGATTTTGATTTATGAAAAGATGGCAAACGCTAATAAGGGGGCTATGACCGAAAATGCCGATGAAAACG  
CGCTACAGTCTGACGCTAAAGGCCAACTTGATTCGTGCTACTGATTACGGTGTCTGATCGATGGTTTCAATGGTGACGTTTCC  
GGCTTGCTAATGGTAATGGTGTACTGGTGATTTTGTGGCTCTAATTCCAAATGGCTCAAGTCGGTGACGGTGATAATTCACC  
TTTAATGAATAATTTCCGTCATATTTACCTTCCCTCCCTCAATCGGTTGAATGTGCGCCCTTTTGTCTTTGGCGCTGGTAAACCAT  
ATGAATTTCTATTTGATTTGTGACAAAATAAATTTATCCGTTGGTGTCTTTGCGTTTCTTTTATATGTTGCCACCTTTATGTATGTA  
TTTTCTACGTTTGCATACTACGTAATAAAGGAGTCTTAATCATGCCAGTCTTTTGGGTATCCGTTATTTATGCGCTTTTCTC  
GGTTTCTTCTGGTAACTTTGTTTCGCTATCTGCTTACTTTTCTTAAAAAGGGCTTCGGTAAGATAGTACTTATTTGCTATTCTG  
TCTTGTCTTATTTATTTGGCTTAACTCAATCTTGTGGGTTATCTCTCTGATATTAGCGCTCAATTAACCTCTGACTTTGTTCCAGG  
GTGTTACGTTAATTTCTCCGCTCTAATGCGCTTCCCTGTTTTTATGTTATTTCTCTCTGTAAAGGCTGCTATTTTCAATTTTGTAGCTT  
AAACAAAAAATCGTTTCTTATTTGGATTGGGATAAATAATATGGCTGTTTATTTTGTAACTGGCAATTAGGCTTCGAAAGACGC  
TCGTTAGCGTTGGTAAGATTAGGATAAATAATTTAGCTGGGTGCAAAAATAGCAACTAATCTTGATTTAAGGCTTCAAAACCTCCCG  
CAAGTCGGGAGGTTGACTAAAACGCTCGGTTCTTFAAGATACCGGATAAGCCCTTCTATCTGATTTGCTTATTTGGCCGCGG  
TAATGATTCCTACGATGAAAATAAAAACGCTTGTCTGTTCTCGATGAGTGGGTTACTTGGTTTAAATACCCGTTCTTGGAAATGATA  
AGGAAAGACAGCCGATTTATTGATTGGTTTCTACATGCTCGTAAATTAGGATGGGATAATTTATTTTCTGTTTCCAGGACTTATCTATT  
GTTGATAAACAGGCGGTTCTGCATTAGCTGAACATGTTGTTTATGTCGTCTGACAGAACTACTTTACCTTTTGTGCGGTAC



TTTATATTCTCTTATTACTGGCTCGAAAATGCCTCTGCCTAAATTACATGTTGGCGTTGTTAAATATGGCGATTCTCAATTAAGCC  
CTACTGTTGAGCGTTGGCTTTATACTGGTAAGAAATTTGTATAACGCATATGATACTAAACAGGCTTTTCTAGTAATTATGATTCC  
GGTGTATTATTCTTATTTAACGCCTTATTTATCACACGGTCGGTATTTCAAACCATTAAATTTAGGTCAGAAGATGAAATTAACATA  
AATATATTTGAAAAAGTCTCTCGCGTTCTTTGTCTTGCATTGGATTTGCATCAGCATTTACATATAGTTATATAACCCAACCTA  
AGCCGAGGTTAAAAAGGTAGTCTCTCAGACCTATGATTTTGATAAATTCACTATGACTCTTCTCAGCGTCTTAATCTAAGCTAT  
CGCTATGTTTTCAAGGATTCTAAGGGAAAATTAATTAATAGCGACGATTTACAGAAGCAAGGTTATTTCACTCACATATATTGATTT  
ATGTACTGTTTCCATTAAAAAGGTAATTCAAATGAAATTTGTTAAATGTAATTAATTTTGTCTTCTGATGTTTGTTCATCATCT  
TCTTTTGCTCAGGTAATTGAAATGAATAATTCGCCTCTGCGCGATTTTGTAACTTGGTATTCAAAGCAATCAGGCGAATCCGTTAT  
TGTTTCTCCCGATGTAAAAGGTACTGTTACTGTATATTCATCTGACGTTAAACCTGAAAATCTACGCAATTTCTTTATTTCTGTTT  
TACGTGCAAATAATTTGATATGGTAGGTTCTAACCTTCCATTATTCAGAAGTATAATCCAAACAATCAGGATTATATTGATGAA  
TTGCCATCATCTGATAATCAGGAATATGATGATAATTCGCTCCTTCTGGTGGTTTCTTTGTTCCGCAAAATGATAATGTTACTCA  
AACTTTTAAATTAATAACGTTCCGGCAAAGGATTTAATACGAGTTGTCGAATGTTTGTAAGTCTAATACTTCTAAATCCTCAA  
ATGTATTATCTATTGACGGCTCTAATCTATTAGTTGTTAGTGCTCTAAAGATATTTAGATAACCTTCCTCAATTCCTTTCACT  
GTTGATTTGCCAATGACCAGATATTGATTGAGGGTTTGATAATTTGAGGTTTACAGCAAGGTGATGCTTTAGATTTTTCATTTGCTGC  
TGGCTCTCAGCGTGGCACTGTTGCAGGCGGTGTTAATACTGACCGCTCACCTCTGTTTTATCTTCTGCTGGTGGTTTCGTTCCGGTA  
TTTTTAATGGCGATGTTTTAGGGCTATCAGTTCCGCGCATTAAAGACTAATAGCCATTCAAAAATATTGTCTGTGCCACGTATTCTT  
ACGCTTTCAGGTCAGAAGGGTTCTATCTCTGTTGGCCAGAATGTCCCTTTTATTACTGGTCTGTGACTGGTGAATCTGCCAATGT  
AAATAATCCATTTTCAGACGATTGAGCGTCAAAATGTAGGTATTTCCATGAGCGTTTTTCTCTGTTGCAATGGCTGGCGGTAATATTG  
TTCGGATATTACCAGCAAGGCCGATAGTTTGAGTTCTTCTACTCAGGCAAGTGATGTTATTACTAATCAAAGAAGTATTGCTACA  
ACGGTTAATTTGCGTGATGGACAGACTCTTTTACTCGGTGGCCTCACTGATTATAAAAAACACTTCTCAGGATTTCTGGCGTACCCTT  
CCTGTCTAAAATCCCTTAATCGGCCTCCTGTTTAGCTCCCGCTCTGATTCTAACGAGGAAAGCACGTTATACGTGCTCGTCAAAG  
CAACCATAGTACGCGCCTGTAGCGCGCATTAAAGCGCGGCGGTGTGGTGGTTACGCGCAGCGTGACCGCTACACTTGCCAGCGC  
CCTAGCGCCCGCTCCTTTCGCTTTC

**Table S4.** Anchor strands and imager strands for characterizing blinking kinetics. Each row from top to bottom corresponds to a bar in Figure S3 from left to right. Highlighted rows represent anchor strands and imager strands used for the multiplexed assays. Sequences are in Table S5 and Table S6.

| miRNA ID | miRNA name         | Anchor strand ID | Imager strand ID |
|----------|--------------------|------------------|------------------|
| 1        | miR-342-3p         | as1-15nt         | is1-7nt          |
| 1        | miR-342-3p         | as1-16nt         | is1-6ntL         |
| <b>1</b> | <b>miR-342-3p</b>  | <b>as1-16nt</b>  | <b>is1-7nt</b>   |
| 1        | miR-342-3p         | as1-14nt         | is1-7ntL         |
| 1        | miR-342-3p         | as1-14nt         | is1-8nt          |
| 2        | miR-21-5p          | as2-13nt         | is2-8nt          |
| 2        | miR-21-5p          | as2-15nt         | is2-7nt          |
| 2        | miR-21-5p          | as2-14nt         | is2-6ntL2        |
| <b>2</b> | <b>miR-21-5p</b>   | <b>as2-14nt</b>  | <b>is2-7ntL</b>  |
| 2        | miR-21-5p          | as2-14nt         | is2-8nt          |
| <b>3</b> | <b>miR-16-5p</b>   | <b>as3-16nt</b>  | <b>is3-5ntL</b>  |
| 3        | miR-16-5p          | as3-13nt         | is3-6ntL         |
| 3        | miR-16-5p          | as3-16nt         | is3-6nt          |
| 3        | miR-16-5p          | as3-14nt         | is3-6ntL         |
| 3        | miR-16-5p          | as3-13nt         | is3-7nt          |
| 3        | miR-16-5p          | as3-15nt         | is3-5ntL2        |
| 4        | miR-145-5p         | as4-14nt         | is4-7ntL         |
| 4        | miR-145-5p         | as4-14nt         | is4-6nt          |
| <b>4</b> | <b>miR-145-5p</b>  | <b>as4-15nt</b>  | <b>is4-6ntL2</b> |
| 4        | miR-145-5p         | as4-16nt         | is4-6nt          |
| 4        | miR-145-5p         | as4-15nt         | is4-7ntL         |
| 4        | miR-145-5p         | as4-14nt         | is4-7nt          |
| 5        | miR-375            | as5-15nt         | is5-7nt          |
| 5        | miR-375            | as5-13nt         | is5-8nt          |
| 5        | miR-375            | as5-14nt         | is5-6ntL2        |
| <b>5</b> | <b>miR-375</b>     | <b>as5-14nt</b>  | <b>is5-7ntL</b>  |
| 6        | miR-24-3p          | as6-14nt         | is6-6ntL         |
| <b>6</b> | <b>miR-24-3p</b>   | <b>as6-14nt</b>  | <b>is6-7nt</b>   |
| 6        | miR-24-3p          | as6-13nt         | is6-7nt          |
| 7        | miR-378a-3p        | as7-13nt         | is7-6nt          |
| <b>7</b> | <b>miR-378a-3p</b> | <b>as7-17nt</b>  | <b>is7-5nt</b>   |
| 7        | miR-378a-3p        | as7-13nt         | is7-6ntL         |
| 7        | miR-378a-3p        | as7-16nt         | is7-6nt          |
| 7        | miR-378a-3p        | as7-13nt         | is7-7nt          |

|           |                    |                  |                   |
|-----------|--------------------|------------------|-------------------|
| 8         | miR-221-3p         | as8-14nt         | is8-7nt           |
| <b>8</b>  | <b>miR-221-3p</b>  | <b>as8-16nt</b>  | <b>is8-6ntL</b>   |
| 8         | miR-221-3p         | as8-14nt         | is8-8nt           |
| 8         | miR-221-3p         | as8-16nt         | is8-7nt           |
| 9         | miR-186-5p         | as9-16nt         | is9-6nt           |
| <b>9</b>  | <b>miR-186-5p</b>  | <b>as9-15nt</b>  | <b>is9-7nt</b>    |
| 9         | miR-186-5p         | as9-14nt         | is9-8nt           |
| <b>10</b> | <b>miR-155-5p</b>  | <b>as10-16nt</b> | <b>is10-7nt</b>   |
| 10        | miR-155-5p         | as10-15nt        | is10-8nt          |
| 11        | miR-642b-3p        | as11-14nt        | is11-7nt          |
| 11        | miR-642b-3p        | as11-13nt        | is11-7ntL         |
| <b>11</b> | <b>miR-642b-3p</b> | <b>as11-15nt</b> | <b>is11-6ntL</b>  |
| 11        | miR-642b-3p        | as11-13nt        | is11-8nt          |
| 11        | miR-642b-3p        | as11-15nt        | is11-7nt          |
| 11        | miR-642b-3p        | as11-14nt        | is11-7ntL         |
| 12        | let-7a-5p          | as12-14nt        | is12-7nt          |
| <b>12</b> | <b>let-7a-5p</b>   | <b>as12-17nt</b> | <b>is12-5nt</b>   |
| 12        | let-7a-5p          | as12-16nt        | is12-5ntL         |
| 12        | let-7a-5p          | as12-16nt        | is12-6nt          |
| 12        | let-7a-5p          | as12-15nt        | is12-7nt          |
| 12        | let-7a-5p          | as12-15nt        | is12-6ntL         |
| 13        | miR-485-3p         | as13-15nt        | is13-6ntL         |
| <b>13</b> | <b>miR-485-3p</b>  | <b>as13-16nt</b> | <b>is13-6nt</b>   |
| 13        | miR-485-3p         | as13-14nt        | is13-7nt          |
| 13        | miR-485-3p         | as13-15nt        | is13-7nt          |
| 14        | miR-372-3p         | as14-17nt        | is14-6nt          |
| 14        | miR-372-3p         | as14-15nt        | is14-7nt          |
| <b>14</b> | <b>miR-372-3p</b>  | <b>as14-16nt</b> | <b>is14-5ntL2</b> |
| 14        | miR-372-3p         | as14-16nt        | is14-6ntL         |
| 14        | miR-372-3p         | as14-16nt        | is14-7nt          |
| 15        | miR-491-5p         | as15-15nt        | is15-5nt          |
| 15        | miR-491-5p         | as15-14nt        | is15-5ntL2        |
| <b>15</b> | <b>miR-491-5p</b>  | <b>as15-15nt</b> | <b>is15-5ntL</b>  |
| 15        | miR-491-5p         | as15-17nt        | is15-5nt          |
| 15        | miR-491-5p         | as15-15nt        | is15-6nt          |
| 16        | miR-154-5p         | as16-15nt        | is16-7nt          |
| <b>16</b> | <b>miR-154-5p</b>  | <b>as16-14nt</b> | <b>is16-6ntL2</b> |
| 16        | miR-154-5p         | as16-14nt        | is16-8nt          |
| 16        | miR-154-5p         | as16-14nt        | is16-7ntL         |

**Table S5.** List of anchor strand sequences. Highlighted rows represent anchor strands used for the multiplexed assays.

| Anchor strand ID | Sequences                             |
|------------------|---------------------------------------|
| as1-14nt         | 5'-Staple-ACGGGTGCGATTTTC-3'          |
| as1-15nt         | 5'-Staple-ACGGGTGCGATTTCT-3'          |
| <b>as1-16nt</b>  | <b>5'-Staple-ACGGGTGCGATTTCTG-3'</b>  |
| as2-13nt         | 5'-Staple-TCAACATCAGTCT-3'            |
| <b>as2-14nt</b>  | <b>5'-Staple-TCAACATCAGTCTG-3'</b>    |
| as2-15nt         | 5'-Staple-TCAACATCAGTCTGA-3'          |
| as3-13nt         | 5'-Staple-CGCCAATATTTAC-3'            |
| as3-14nt         | 5'-Staple-CGCCAATATTTACG-3'           |
| as3-15nt         | 5'-Staple-CGCCAATATTTACGT-3'          |
| <b>as3-16nt</b>  | <b>5'-Staple-CGCCAATATTTACGTG-3'</b>  |
| as4-14nt         | 5'-Staple-AGGGATTCCTGGGA-3'           |
| <b>as4-15nt</b>  | <b>5'-Staple-AGGGATTCCTGGGAA-3'</b>   |
| as4-16nt         | 5'-Staple-AGGGATTCCTGGGAAA-3'         |
| as5-13nt         | 5'-Staple-TCACGCGAGCCGA-3'            |
| <b>as5-14nt</b>  | <b>5'-Staple-TCACGCGAGCCGAA-3'</b>    |
| as5-15nt         | 5'-Staple-TCACGCGAGCCGAAC-3'          |
| as6-13nt         | 5'-Staple-CTGTTCTGCTGA-3'             |
| <b>as6-14nt</b>  | <b>5'-Staple-CTGTTCTGCTGAA-3'</b>     |
| as7-13nt         | 5'-Staple-GCCTTCTGACTCC-3'            |
| as7-16nt         | 5'-Staple-GCCTTCTGACTCCAAG-3'         |
| <b>as7-17nt</b>  | <b>5'-Staple-GCCTTCTGACTCCAAGT-3'</b> |
| as8-14nt         | 5'-Staple-GAAACCCAGCAGAC-3'           |
| <b>as8-16nt</b>  | <b>5'-Staple-GAAACCCAGCAGACAA-3'</b>  |
| as9-14nt         | 5'-Staple-AGCCCAAAGGAGA-3'            |
| <b>as9-15nt</b>  | <b>5'-Staple-AGCCCAAAGGAGAA-3'</b>    |
| as9-16nt         | 5'-Staple-AGCCCAAAGGAGAAT-3'          |
| as10-15nt        | 5'-Staple-ACCCCTATCACGATT-3'          |
| <b>as10-16nt</b> | <b>5'-Staple-ACCCCTATCACGATTA-3'</b>  |
| as11-13nt        | 5'-Staple-GGGTCCCTCTCCA-3'            |
| as11-14nt        | 5'-Staple-GGGTCCCTCTCCAA-3'           |
| <b>as11-15nt</b> | <b>5'-Staple-GGGTCCCTCTCCAAA-3'</b>   |
| as12-14nt        | 5'-Staple-AACTATACAACCTA-3'           |
| as12-15nt        | 5'-Staple-AACTATACAACCTAC-3'          |
| as12-16nt        | 5'-Staple-AACTATACAACCTACT-3'         |
| <b>as12-17nt</b> | <b>5'-Staple-AACTATACAACCTACTA-3'</b> |
| as13-14nt        | 5'-Staple-AGAGAGGAGAGCCG-3'           |
| as13-15nt        | 5'-Staple-AGAGAGGAGAGCCGT-3'          |

|                  |                                       |
|------------------|---------------------------------------|
| <b>as13-16nt</b> | <b>5'-Staple-AGAGAGGAGAGCCGTG-3'</b>  |
| as14-15nt        | 5'-Staple-ACGCTCAAATGTTCGC-3'         |
| <b>as14-16nt</b> | <b>5'-Staple-ACGCTCAAATGTTCGCA-3'</b> |
| as14-17nt        | 5'-Staple-ACGCTCAAATGTTCGAG-3'        |
| as15-14nt        | 5'-Staple-CCTCATGGAAGGGT-3'           |
| <b>as15-15nt</b> | <b>5'-Staple-CCTCATGGAAGGGTT-3'</b>   |
| as15-17nt        | 5'-Staple-CCTCATGGAAGGGTCC-3'         |
| <b>as16-14nt</b> | <b>5'-Staple-CGAAGGCAACACGG-3'</b>    |
| as16-15nt        | 5'-Staple-CGAAGGCAACACGGA-3'          |

**Table S6.** List of fluorophore labeled imager strand sequences. Highlighted rows represent anchor strands used for the multiplexed assays.

| Imager strand ID | Sequence (5' → 3')     |
|------------------|------------------------|
| <b>P1</b>        | <b>CTAGATGTAT-Cy3b</b> |
| is1-6ntL         | TGTGAG-Cy3b            |
| <b>is1-7nt</b>   | <b>TGTGAGA-Cy3b</b>    |
| is1-7ntL         | GTGTGAG-Cy3b           |
| is1-8nt          | GTGTGAGA-Cy3b          |
| is2-6ntL2        | ATAAGC-Cy3b            |
| is2-7nt          | TAAGCTA-Cy3b           |
| <b>is2-7ntL</b>  | <b>ATAAGCT-Cy3b</b>    |
| is2-8nt          | ATAAGCTA-Cy3b          |
| <b>is3-5ntL</b>  | <b>CTGCT-Cy3b</b>      |
| is3-5ntL2        | GCTGC-Cy3b             |
| is3-6nt          | CTGCTA-Cy3b            |
| is3-6ntL         | GCTGCT-Cy3b            |
| is3-7nt          | GCTGCTA-Cy3b           |
| is4-6nt          | CTGGAC-Cy3b            |
| <b>is4-6ntL2</b> | <b>AACTGG-Cy3b</b>     |
| is4-7nt          | ACTGGAC-Cy3b           |
| is4-7ntL         | AACTGGA-Cy3b           |
| is5-6ntL2        | CGAACA-Cy3b            |
| is5-7nt          | GAACAAA-Cy3b           |
| <b>is5-7ntL</b>  | <b>CGAACAA-Cy3b</b>    |
| is5-8nt          | CGAACAAA-Cy3b          |
| is6-6ntL         | TGAGCC-Cy3b            |
| <b>is6-7nt</b>   | <b>TGAGCCA-Cy3b</b>    |
| <b>is7-5nt</b>   | <b>CCAGT-Cy3b</b>      |
| is7-6nt          | TCCAGT-Cy3b            |
| is7-6ntL         | GTCCAG-Cy3b            |
| is7-7nt          | GTCCAGT-Cy3b           |
| <b>is8-6ntL</b>  | <b>TGTAGC-Cy3b</b>     |
| is8-7nt          | TGTAGCT-Cy3b           |
| is8-8nt          | ATGTAGCT-Cy3b          |
| is9-6nt          | TCTTTG-Cy3b            |
| <b>is9-7nt</b>   | <b>TTCTTTG-Cy3b</b>    |
| is9-8nt          | ATTCTTTG-Cy3b          |
| <b>is10-7nt</b>  | <b>GCATTAA-Cy3b</b>    |
| is10-8nt         | AGCATTAA-Cy3b          |
| <b>is11-6ntL</b> | <b>TGTGTC-Cy3b</b>     |

|                   |                    |
|-------------------|--------------------|
| is11-7nt          | TGTGTCT-Cy3b       |
| is11-7ntL         | ATGTGTC-Cy3b       |
| is11-8nt          | ATGTGTCT-Cy3b      |
| <b>is12-5nt</b>   | <b>CCTCA-Cy3b</b>  |
| is12-5ntL         | ACCTC-Cy3b         |
| is12-6nt          | ACCTCA-Cy3b        |
| is12-6ntL         | TACCTC-Cy3b        |
| is12-7nt          | TACCTCA-Cy3b       |
| <b>is13-6nt</b>   | <b>TATGAC-Cy3b</b> |
| is13-6ntL         | GTATGA-Cy3b        |
| is13-7nt          | GTATGAC-Cy3b       |
| <b>is14-5ntL2</b> | <b>GCACT-Cy3b</b>  |
| is14-6nt          | CACTTT-Cy3b        |
| is14-6ntL         | GCACTT-Cy3b        |
| is14-7nt          | GCACTTT-Cy3b       |
| is15-5nt          | CCACT-Cy3b         |
| <b>is15-5ntL</b>  | <b>CCCAC-Cy3b</b>  |
| is15-5ntL2        | CCCCA-Cy3b         |
| is15-6nt          | CCCACT-Cy3b        |
| <b>is16-6ntL2</b> | <b>ATAACC-Cy3b</b> |
| is16-7nt          | TAACCTA-Cy3b       |
| is16-7ntL         | ATAACCT-Cy3b       |
| is16-8nt          | ATAACCTA-Cy3b      |

**Table S7.** Concentrations of imager strands in the imaging buffer for the final super-resolution imaging in the multiplexed assays. Imager strands shown here ensure similar blinking duty cycle for each docking site.

| miRNA ID | miRNA name  | Imager strand ID | Concentration (nM) |
|----------|-------------|------------------|--------------------|
|          |             | P1               | 2.00               |
| 1        | miR-342-3p  | is1-7nt          | 1.04               |
| 2        | miR-21-5p   | is2-7ntL         | 0.82               |
| 3        | miR-16-5p   | is3-5ntL         | 0.37               |
| 4        | miR-145-5p  | is4-6ntL2        | 1.10               |
| 5        | miR-375     | is5-7ntL         | 0.57               |
| 6        | miR-24-3p   | is6-7nt          | 1.05               |
| 7        | miR-378a-3p | is7-5nt          | 0.53               |
| 8        | miR-221-3p  | is8-6ntL         | 1.49               |
| 9        | miR-186-5p  | is9-7nt          | 2.29               |
| 10       | miR-155-5p  | is10-7nt         | 0.92               |
| 11       | miR-642b-3p | is11-6ntL        | 1.10               |
| 12       | let-7a-5p   | is12-5nt         | 0.35               |
| 13       | miR-485-3p  | is13-6nt         | 0.90               |
| 14       | miR-372-3p  | is14-5ntL2       | 0.51               |
| 15       | miR-491-5p  | is15-5ntL        | 0.85               |
| 16       | miR-154-5p  | is16-6ntL2       | 1.17               |



**Table S8.** Theoretical limit of detection (LoD) for miRNA targets in the multiplexed assays. The theoretical LoD for each miRNA was estimated by the mean of the fitted values for background signals (controls) plus 3 times the standard deviation of the fitted values, i.e.,

$$LoD = c_{control} + 3\sigma_{control},$$

where  $c_{control}$  is the fitted value for controls, and  $\sigma_{control}$  is the standard deviation.

| miRNA ID | miRNA name  | Theoretical LoD (pM) |
|----------|-------------|----------------------|
| 1        | miR-342-3p  | 0.5                  |
| 2        | miR-21-5p   | 7                    |
| 3        | miR-16-5p   | 3                    |
| 4        | miR-145-5p  | 1                    |
| 5        | miR-375     | 1                    |
| 6        | miR-24-3p   | 1                    |
| 7        | miR-378a-3p | 1                    |
| 8        | miR-221-3p  | 1                    |
| 9        | miR-186-5p  | 0.9                  |
| 10       | miR-155-5p  | 5                    |
| 11       | miR-642b-3p | 0.1                  |
| 12       | let-7a-5p   | 0.1                  |
| 13       | miR-485-3p  | 4                    |
| 14       | miR-372-3p  | 3                    |
| 15       | miR-491-5p  | 1                    |
| 16       | miR-154-5p  | 4                    |

## 4. References

1. Dai, M.; Jungmann, R.; Yin, P., Optical imaging of individual biomolecules in densely packed clusters. *Nature nanotechnology* **2016**, *11* (9), 798.
2. Panwar, B.; Omenn, G. S.; Guan, Y., miRmine: a database of human miRNA expression profiles. *Bioinformatics* **2017**, *33* (10), 1554-1560.
3. Kumar, S.; Gomez, E. C.; Chalabi-Dchar, M.; Rong, C.; Das, S.; Ugrinova, I.; Gaume, X.; Monier, K.; Mongelard, F.; Bouvet, P., Integrated analysis of mRNA and miRNA expression in HeLa cells expressing low levels of Nucleolin. *Scientific reports* **2017**, *7* (1), 9017.
4. Chen, J.; Lozach, J.; Garcia, E. W.; Barnes, B.; Luo, S.; Mikoulitch, I.; Zhou, L.; Schroth, G.; Fan, J.-B., Highly sensitive and specific microRNA expression profiling using BeadArray technology. *Nucleic acids research* **2008**, *36* (14), e87-e87.
